# Supplementary material for: Burden, Trends, and Inequalities of Heart Failure Globally, 1990 to 2019: A Secondary Analysis Based on the Global Burden of Disease 2019 Study
Source: PubMed Central journal article supplement — J Am Heart Assoc. 2023 Mar 9;12(6):e027852. doi: 10.1161/JAHA.122.027852 (PMC10111559; doi:10.1161/jaha.122.027852), 2023-03-09

## **SUPPLEMENTAL MATERIAL**

**Table S1.** The age-standardized rates (ASRs) of prevalence per 100,000 populations for subtypes of heart failure in 1990 and 2019 globally and in 21 Global Burden of Diseases (GBD) regions

| Regions                    | Treated heart failure         |       |       |         |       |       | Mild heart failure |        |        |         |       |        | Moderate heart failure |       |        |         |       |        | Severe heart failure |        |        |         |        |        |
|----------------------------|-------------------------------|-------|-------|---------|-------|-------|--------------------|--------|--------|---------|-------|--------|------------------------|-------|--------|---------|-------|--------|----------------------|--------|--------|---------|--------|--------|
|                            | 1990                          |       |       | 2019    |       |       | 1990               |        |        | 2019    |       |        | 1990                   |       |        | 2019    |       |        | 1990                 |        |        | 2019    |        |        |
|                            | 95% uncertainty interval (UI) |       |       |         |       |       | 95% UI             |        |        |         |       |        | 95% UI                 |       |        |         |       |        | 95% UI               |        |        |         |        |        |
|                            | ASRs                          |       | ASRs  |         | ASRs  |       | ASRs               |        | ASRs   |         | ASRs  |        | ASRs                   |       | ASRs   |         | ASRs  |        | ASRs                 |        | ASRs   |         | ASRs   |        |
|                            | per                           | lower | upper | per     | lower | upper | per                | lower  | upper  | per     | lower | upper  | per                    | lower | upper  | per     | lower | upper  | per                  | lower  | upper  | per     | lower  | upper  |
|                            | 100,000                       |       |       | 100,000 |       |       | 100,000            |        |        | 100,000 |       |        | 100,000                |       |        | 100,000 |       |        | 100,000              |        |        | 100,000 |        |        |
| Global                     | 283.86                        | 22638 | 34894 | 263.35  | 21426 | 32108 | 142.23             | 99.69  | 191.72 | 132.20  | 93.06 | 178.44 | 92.32                  | 64.19 | 127.59 | 85.86   | 60.11 | 119.53 | 247.59               | 196.04 | 308.51 | 230.49  | 184.89 | 285.93 |
| Andean Latin America       | 210.32                        | 16774 | 26044 | 184.49  | 14498 | 23312 | 84.25              | 61.11  | 111.98 | 83.47   | 58.33 | 113.64 | 50.05                  | 35.02 | 71.54  | 52.20   | 36.62 | 74.11  | 117.33               | 86.96  | 158.12 | 132.84  | 99.83  | 177.66 |
| Australasia                | 427.90                        | 33404 | 52547 | 276.43  | 21855 | 33713 | 215.73             | 146.15 | 29807  | 139.41  | 94.87 | 19030  | 140.22                 | 99.57 | 19234  | 90.62   | 64.39 | 12351  | 377.21               | 29498  | 46849  | 243.79  | 19271  | 303.74 |
| Caribbean                  | 200.00                        | 15258 | 25890 | 192.23  | 14754 | 25041 | 100.79             | 68.12  | 13994  | 96.92   | 65.65 | 13482  | 65.53                  | 44.79 | 92.60  | 63.02   | 43.09 | 89.91  | 176.28               | 13459  | 23067  | 169.51  | 12955  | 224.75 |
| Central Asia               | 214.54                        | 16223 | 27795 | 200.47  | 15258 | 25844 | 108.19             | 72.10  | 15187  | 101.10  | 67.96 | 14073  | 70.38                  | 48.38 | 101.58 | 65.76   | 44.55 | 94.36  | 189.27               | 14536  | 24754  | 176.85  | 135.70 | 232.34 |
| Central Europe             | 290.67                        | 22560 | 36374 | 265.18  | 21668 | 31837 | 146.59             | 100.53 | 20231  | 133.73  | 94.50 | 17929  | 95.34                  | 66.31 | 13507  | 86.98   | 61.35 | 11834  | 256.43               | 19996  | 32573  | 233.96  | 189.16 | 289.18 |
| Central Latin America      | 214.23                        | 17147 | 26373 | 186.18  | 14709 | 23262 | 98.00              | 69.65  | 13259  | 87.00   | 61.13 | 11821  | 61.58                  | 43.10 | 86.51  | 55.10   | 38.43 | 77.57  | 157.74               | 120.50 | 20747  | 142.78  | 11025  | 187.17 |
| Central Sub-Saharan Africa | 183.90                        | 13248 | 24854 | 177.80  | 12917 | 23822 | 92.78              | 61.47  | 13350  | 89.71   | 59.02 | 12855  | 60.32                  | 39.85 | 89.90  | 58.32   | 38.27 | 85.54  | 162.26               | 11586  | 21663  | 156.87  | 11239  | 212.57 |

|                              |        |       |       |        |       |       |        |       |       |        |       |       |        |       |       |        |       |       |        |       |       |        |       |       |
|------------------------------|--------|-------|-------|--------|-------|-------|--------|-------|-------|--------|-------|-------|--------|-------|-------|--------|-------|-------|--------|-------|-------|--------|-------|-------|
| East Asia                    | 390.58 | 31051 | 48740 | 373.55 | 29713 | 46362 | 196.95 | 13614 | 26890 | 188.37 | 13152 | 25595 | 128.15 | 87.70 | 17918 | 122.56 | 84.32 | 17150 | 344.63 | 26987 | 43780 | 329.59 | 25799 | 41655 |
| Eastern Europe               | 206.88 | 16277 | 25816 | 206.39 | 16388 | 25644 | 104.33 | 73.01 | 14033 | 104.08 | 72.61 | 14084 | 67.85  | 47.41 | 93.23 | 67.69  | 47.02 | 93.04 | 182.51 | 14365 | 23092 | 182.07 | 14285 | 22997 |
| Eastern Sub-Saharan Africa   | 280.58 | 21515 | 35565 | 299.35 | 23044 | 38151 | 141.51 | 95.83 | 19755 | 150.98 | 10232 | 21066 | 91.99  | 62.10 | 13028 | 98.15  | 66.34 | 14087 | 247.56 | 18525 | 31977 | 264.12 | 19648 | 34039 |
| High-income Asia Pacific     | 210.58 | 17019 | 26133 | 164.04 | 13862 | 19382 | 106.21 | 73.59 | 14432 | 82.73  | 58.77 | 10897 | 69.08  | 49.11 | 97.07 | 53.80  | 38.67 | 72.38 | 185.73 | 14786 | 23094 | 144.71 | 12003 | 17456 |
| High-income North America    | 471.16 | 38116 | 57259 | 425.36 | 36043 | 50103 | 237.46 | 16757 | 31989 | 214.39 | 15197 | 28409 | 154.40 | 10936 | 21253 | 139.38 | 99.44 | 18582 | 415.17 | 33052 | 51290 | 374.95 | 30738 | 44934 |
| North Africa and Middle East | 292.36 | 22209 | 37826 | 288.98 | 22433 | 36391 | 147.42 | 10031 | 20592 | 145.70 | 10084 | 20218 | 95.89  | 64.99 | 13943 | 94.77  | 65.28 | 13501 | 257.90 | 19712 | 33971 | 254.94 | 19872 | 32951 |
| Oceania                      | 299.79 | 22931 | 39132 | 304.88 | 23341 | 39695 | 151.17 | 10166 | 20868 | 153.75 | 10340 | 21593 | 98.33  | 67.67 | 14313 | 100.02 | 68.42 | 14468 | 264.51 | 19989 | 34928 | 268.99 | 20417 | 35163 |
| South Asia                   | 137.83 | 10895 | 17327 | 143.65 | 11292 | 17981 | 69.50  | 48.18 | 96.10 | 72.44  | 49.91 | 10007 | 45.22  | 31.03 | 63.09 | 47.13  | 32.62 | 66.08 | 121.62 | 94.69 | 15540 | 126.75 | 99.19 | 16309 |
| Southeast Asia               | 268.62 | 20873 | 34399 | 278.49 | 21754 | 35478 | 135.45 | 93.14 | 18591 | 140.41 | 97.30 | 19173 | 88.10  | 60.01 | 12514 | 91.34  | 62.49 | 12917 | 236.99 | 18348 | 30540 | 245.70 | 19192 | 31326 |
| Southern Latin America       | 314.82 | 25183 | 38789 | 242.22 | 19147 | 30477 | 132.11 | 94.98 | 17710 | 111.51 | 77.39 | 15493 | 80.13  | 55.51 | 11317 | 70.23  | 49.09 | 10021 | 194.40 | 14410 | 26062 | 180.43 | 13622 | 23547 |
| Southern Sub-Saharan Africa  | 272.70 | 21019 | 34904 | 244.01 | 18800 | 31348 | 137.52 | 94.64 | 19018 | 123.05 | 84.58 | 17066 | 89.42  | 61.05 | 12795 | 80.02  | 54.76 | 11450 | 240.59 | 18198 | 31077 | 215.29 | 16208 | 27723 |

Tropical

|       |        |       |       |        |       |       |       |       |       |       |       |       |       |       |       |       |       |       |        |       |       |        |       |       |
|-------|--------|-------|-------|--------|-------|-------|-------|-------|-------|-------|-------|-------|-------|-------|-------|-------|-------|-------|--------|-------|-------|--------|-------|-------|
| Latin | 216.03 | 17399 | 26360 | 193.20 | 15559 | 23851 | 98.48 | 70.79 | 13328 | 90.43 | 64.90 | 12362 | 61.79 | 43.20 | 86.30 | 57.31 | 40.00 | 80.35 | 157.93 | 12085 | 20486 | 148.62 | 11377 | 19313 |
|-------|--------|-------|-------|--------|-------|-------|-------|-------|-------|-------|-------|-------|-------|-------|-------|-------|-------|-------|--------|-------|-------|--------|-------|-------|

America

Western

Europe

|  |        |       |       |        |       |       |        |       |       |        |       |       |       |       |       |       |       |       |        |       |       |        |       |       |
|--|--------|-------|-------|--------|-------|-------|--------|-------|-------|--------|-------|-------|-------|-------|-------|-------|-------|-------|--------|-------|-------|--------|-------|-------|
|  | 269.81 | 21385 | 33255 | 214.24 | 17386 | 25869 | 136.02 | 93.62 | 18494 | 107.97 | 75.84 | 14523 | 88.46 | 62.57 | 12127 | 70.20 | 49.77 | 96.39 | 237.94 | 18845 | 29608 | 188.85 | 15087 | 23315 |
|--|--------|-------|-------|--------|-------|-------|--------|-------|-------|--------|-------|-------|-------|-------|-------|-------|-------|-------|--------|-------|-------|--------|-------|-------|

Western Sub-

Saharan

|  |        |       |       |        |       |       |        |       |       |        |       |       |       |       |       |       |       |       |        |       |       |        |       |       |
|--|--------|-------|-------|--------|-------|-------|--------|-------|-------|--------|-------|-------|-------|-------|-------|-------|-------|-------|--------|-------|-------|--------|-------|-------|
|  | 218.48 | 16909 | 27713 | 233.73 | 17963 | 29884 | 110.20 | 75.70 | 15204 | 117.89 | 79.96 | 16300 | 71.67 | 48.04 | 10020 | 76.67 | 51.22 | 10809 | 192.77 | 14502 | 25029 | 206.23 | 15448 | 26700 |
|--|--------|-------|-------|--------|-------|-------|--------|-------|-------|--------|-------|-------|-------|-------|-------|-------|-------|-------|--------|-------|-------|--------|-------|-------|

Africa

**Table S2.** The age-standardized rates (ASRs) of years lived with disabilities (YLDs) per 100,000 populations for subtypes of heart failure in 1990 and 2019 globally and in 21 Global Burden of Diseases (GBD) regions

| Regions                    | Treated heart failure         |       |       |         |       |       | Mild heart failure |       |       |         |       |       | Moderate heart failure |       |       |         |       |       | Severe heart failure |       |       |         |       |       |
|----------------------------|-------------------------------|-------|-------|---------|-------|-------|--------------------|-------|-------|---------|-------|-------|------------------------|-------|-------|---------|-------|-------|----------------------|-------|-------|---------|-------|-------|
|                            | 1990                          |       |       | 2019    |       |       | 1990               |       |       | 2019    |       |       | 1990                   |       |       | 2019    |       |       | 1990                 |       |       | 2019    |       |       |
|                            | 95% uncertainty interval (UI) |       |       |         |       |       | 95% UI             |       |       |         |       |       | 95% UI                 |       |       |         |       |       | 95% UI               |       |       |         |       |       |
|                            | ASRs                          |       | ASRs  |         | ASRs  |       | ASRs               |       | ASRs  |         | ASRs  |       | ASRs                   |       | ASRs  |         | ASRs  |       | ASRs                 |       | ASRs  |         | ASRs  |       |
|                            | per                           | lower | upper | per     | lower | upper | per                | lower | upper | per     | lower | upper | per                    | lower | upper | per     | lower | upper | per                  | lower | upper | per     | lower | upper |
|                            | 100,000                       |       |       | 100,000 |       |       | 100,000            |       |       | 100,000 |       |       | 100,000                |       |       | 100,000 |       |       | 100,000              |       |       | 100,000 |       |       |
|                            | Global                        | 13.58 | 7.92  | 20.79   | 12.62 | 7.36  | 19.30              | 5.78  | 3.13  | 9.59    | 5.37  | 2.92  | 8.95                   | 6.44  | 3.67  | 10.18   | 6.00  | 3.44  | 9.50                 | 42.80 | 27.66 | 62.22   | 39.93 | 25.96 |
| Andean Latin America       | 10.04                         | 5.95  | 15.07 | 8.82    | 5.21  | 13.46 | 3.41               | 1.86  | 5.53  | 3.39    | 1.84  | 5.60  | 3.48                   | 1.99  | 5.44  | 3.64    | 2.07  | 5.73  | 20.10                | 12.43 | 30.36 | 22.92   | 14.20 | 34.61 |
| Australasia                | 20.60                         | 12.14 | 32.23 | 13.33   | 7.90  | 21.03 | 8.81               | 4.74  | 14.81 | 5.71    | 3.08  | 9.57  | 9.84                   | 5.62  | 15.65 | 6.38    | 3.69  | 10.03 | 65.68                | 42.82 | 97.17 | 42.58   | 27.44 | 62.95 |
| Caribbean                  | 9.56                          | 5.69  | 14.99 | 9.21    | 5.43  | 14.38 | 4.09               | 2.14  | 6.93  | 3.94    | 2.10  | 6.81  | 4.57                   | 2.63  | 7.27  | 4.41    | 2.50  | 7.06  | 30.43                | 19.22 | 45.78 | 29.37   | 18.69 | 43.96 |
| Central Asia               | 10.24                         | 6.11  | 16.08 | 9.58    | 5.73  | 14.95 | 4.38               | 2.34  | 7.38  | 4.10    | 2.19  | 6.95  | 4.90                   | 2.75  | 7.85  | 4.58    | 2.58  | 7.38  | 32.64                | 20.65 | 48.12 | 30.54   | 19.44 | 44.84 |
| Central Europe             | 13.95                         | 8.21  | 21.48 | 12.75   | 7.60  | 19.36 | 5.97               | 3.23  | 10.05 | 5.46    | 3.00  | 9.06  | 6.68                   | 3.79  | 10.56 | 6.10    | 3.52  | 9.65  | 44.57                | 28.74 | 64.95 | 40.74   | 26.79 | 59.35 |
| Central Latin America      | 10.22                         | 6.06  | 15.57 | 8.91    | 5.24  | 13.59 | 3.97               | 2.15  | 6.56  | 3.53    | 1.90  | 5.92  | 4.28                   | 2.48  | 6.78  | 3.85    | 2.20  | 6.12  | 27.09                | 17.18 | 40.82 | 24.67   | 15.44 | 37.64 |
| Central Sub-Saharan Africa | 8.76                          | 4.99  | 13.84 | 8.50    | 4.77  | 13.34 | 3.76               | 1.96  | 6.51  | 3.64    | 1.92  | 6.21  | 4.19                   | 2.27  | 6.92  | 4.06    | 2.19  | 6.65  | 27.86                | 16.96 | 42.31 | 27.07   | 16.42 | 40.88 |

|                              |       |       |       |       |       |       |      |      |       |      |      |       |       |      |       |      |      |       |       |       |        |       |       |       |
|------------------------------|-------|-------|-------|-------|-------|-------|------|------|-------|------|------|-------|-------|------|-------|------|------|-------|-------|-------|--------|-------|-------|-------|
| East Asia                    | 18.55 | 10.81 | 28.47 | 17.85 | 10.35 | 27.52 | 7.94 | 4.28 | 13.45 | 7.64 | 4.11 | 12.75 | 8.87  | 5.01 | 14.28 | 8.54 | 4.84 | 13.74 | 59.00 | 37.82 | 87.04  | 56.91 | 36.30 | 84.06 |
| Eastern Europe               | 9.90  | 5.86  | 15.21 | 9.88  | 5.88  | 15.11 | 4.23 | 2.27 | 7.09  | 4.23 | 2.27 | 7.11  | 4.73  | 2.68 | 7.48  | 4.73 | 2.71 | 7.40  | 31.59 | 20.23 | 46.01  | 31.56 | 20.05 | 45.93 |
| Eastern Sub-Saharan Africa   | 13.31 | 7.70  | 20.91 | 14.25 | 8.31  | 22.15 | 5.70 | 3.05 | 9.39  | 6.10 | 3.25 | 10.18 | 6.36  | 3.55 | 10.28 | 6.81 | 3.82 | 10.90 | 42.24 | 26.52 | 62.84  | 45.30 | 28.29 | 67.81 |
| High-income Asia Pacific     | 10.15 | 6.06  | 15.82 | 7.93  | 4.82  | 12.12 | 4.35 | 2.37 | 7.09  | 3.39 | 1.89 | 5.52  | 4.86  | 2.78 | 7.67  | 3.80 | 2.21 | 5.87  | 32.44 | 21.01 | 46.88  | 25.38 | 16.69 | 36.48 |
| High-income North America    | 22.74 | 13.53 | 34.67 | 20.49 | 12.68 | 30.41 | 9.73 | 5.37 | 16.08 | 8.76 | 4.97 | 14.50 | 10.88 | 6.30 | 17.29 | 9.80 | 5.81 | 15.13 | 72.68 | 46.55 | 106.08 | 65.44 | 43.02 | 94.83 |
| North Africa and Middle East | 13.98 | 8.17  | 21.49 | 13.87 | 8.13  | 21.37 | 5.98 | 3.16 | 10.00 | 5.94 | 3.17 | 9.99  | 6.68  | 3.80 | 10.97 | 6.64 | 3.72 | 10.77 | 44.51 | 28.30 | 66.85  | 44.30 | 28.85 | 66.35 |
| Oceania                      | 14.25 | 8.33  | 22.21 | 14.51 | 8.40  | 22.77 | 6.10 | 3.27 | 10.32 | 6.21 | 3.31 | 10.58 | 6.82  | 3.83 | 11.00 | 6.94 | 3.89 | 11.10 | 45.32 | 28.58 | 67.20  | 46.18 | 29.40 | 68.18 |
| South Asia                   | 6.47  | 3.76  | 9.94  | 6.78  | 3.93  | 10.40 | 2.77 | 1.48 | 4.60  | 2.90 | 1.54 | 4.85  | 3.09  | 1.75 | 5.00  | 3.24 | 1.83 | 5.22  | 20.43 | 13.05 | 30.18  | 21.49 | 13.74 | 32.33 |
| Southeast Asia               | 12.73 | 7.39  | 19.46 | 13.28 | 7.82  | 20.27 | 5.45 | 2.90 | 9.12  | 5.68 | 3.05 | 9.54  | 6.09  | 3.49 | 9.76  | 6.35 | 3.64 | 10.17 | 40.40 | 25.82 | 60.07  | 42.25 | 27.19 | 62.67 |
| Southern Latin America       | 15.15 | 9.05  | 22.85 | 11.67 | 6.94  | 17.95 | 5.39 | 2.90 | 8.80  | 4.56 | 2.49 | 7.70  | 5.62  | 3.22 | 8.72  | 4.93 | 2.82 | 7.81  | 33.75 | 20.79 | 50.42  | 31.45 | 19.91 | 47.61 |
| Southern Sub-Saharan Africa  | 12.98 | 7.70  | 20.51 | 11.64 | 6.87  | 18.36 | 5.56 | 3.04 | 9.24  | 4.98 | 2.69 | 8.23  | 6.20  | 3.53 | 9.71  | 5.57 | 3.15 | 8.76  | 41.26 | 25.66 | 62.77  | 37.07 | 22.91 | 56.03 |



**Table S3.** The age-standardized rates (ASRs) of prevalence per 100,000 populations for heart failure in 1990 and 2019 globally and in 21 Global Burden of Diseases (GBD) regions by sex

| Regions                    | 1990                          |         |         |                  |        |         | 2019             |        |         |                  |        |         |
|----------------------------|-------------------------------|---------|---------|------------------|--------|---------|------------------|--------|---------|------------------|--------|---------|
|                            | Males                         |         |         | Females          |        |         | Males            |        |         | Females          |        |         |
|                            | 95% uncertainty interval (UI) |         |         | 95% UI           |        |         | 95% UI           |        |         | 95% UI           |        |         |
|                            | ASRs per 100,000              | lower   | upper   | ASRs per 100,000 | lower  | upper   | ASRs per 100,000 | lower  | upper   | ASRs per 100,000 | lower  | upper   |
| Global                     | 864.24                        | 703.70  | 1048.41 | 685.99           | 561.61 | 834.72  | 785.70           | 649.52 | 944.89  | 646.15           | 537.36 | 783.01  |
| Andean Latin America       | 562.82                        | 449.81  | 715.01  | 369.03           | 294.38 | 457.73  | 559.75           | 433.68 | 718.77  | 357.88           | 282.69 | 450.79  |
| Australasia                | 1265.88                       | 1000.01 | 1538.13 | 1075.23          | 856.46 | 1308.97 | 857.90           | 688.50 | 1050.53 | 656.12           | 532.05 | 788.83  |
| Caribbean                  | 702.08                        | 539.88  | 909.26  | 404.44           | 321.37 | 513.01  | 682.17           | 528.13 | 880.77  | 390.64           | 307.71 | 501.97  |
| Central Asia               | 652.99                        | 508.28  | 834.48  | 529.14           | 409.11 | 684.46  | 627.34           | 491.04 | 795.36  | 478.48           | 370.40 | 617.10  |
| Central Europe             | 904.97                        | 717.50  | 1123.44 | 697.14           | 548.91 | 872.07  | 855.08           | 713.84 | 1016.43 | 610.74           | 509.86 | 731.43  |
| Central Latin America      | 629.40                        | 499.20  | 780.87  | 443.51           | 357.40 | 557.66  | 573.32           | 455.64 | 718.72  | 388.21           | 310.20 | 488.80  |
| Central Sub-Saharan Africa | 581.64                        | 428.38  | 774.88  | 430.13           | 316.15 | 573.84  | 579.17           | 427.70 | 766.85  | 419.58           | 305.98 | 553.02  |
| East Asia                  | 1085.73                       | 875.57  | 1339.93 | 1005.90          | 814.21 | 1249.35 | 991.23           | 808.02 | 1228.71 | 1001.01          | 819.06 | 1245.62 |
| Eastern Europe             | 582.92                        | 464.72  | 714.88  | 536.95           | 427.34 | 661.27  | 574.95           | 467.34 | 700.80  | 538.38           | 427.98 | 659.54  |
| Eastern Sub-Saharan Africa | 961.68                        | 765.25  | 1207.38 | 581.54           | 453.13 | 736.81  | 1059.12          | 844.06 | 1322.71 | 609.98           | 475.46 | 770.77  |



|                              |         |         |         |         |        |         |         |         |         |        |        |         |
|------------------------------|---------|---------|---------|---------|--------|---------|---------|---------|---------|--------|--------|---------|
| High-income Asia Pacific     | 645.81  | 534.51  | 782.54  | 504.36  | 412.33 | 623.04  | 515.80  | 444.92  | 598.55  | 376.87 | 325.60 | 436.41  |
| High-income North America    | 1528.53 | 1259.67 | 1856.70 | 1094.97 | 918.09 | 1303.05 | 1344.62 | 1159.53 | 1556.54 | 993.84 | 866.22 | 1140.37 |
| North Africa and Middle East | 912.98  | 703.30  | 1163.90 | 675.26  | 527.26 | 854.68  | 879.44  | 697.33  | 1101.27 | 686.58 | 557.61 | 850.08  |
| Oceania                      | 875.69  | 679.90  | 1133.87 | 744.66  | 579.73 | 972.67  | 893.47  | 697.66  | 1160.60 | 753.88 | 591.97 | 969.00  |
| South Asia                   | 391.80  | 316.14  | 489.41  | 355.18  | 286.64 | 444.32  | 406.15  | 326.94  | 503.61  | 374.85 | 303.13 | 465.75  |
| Southeast Asia               | 910.84  | 723.55  | 1154.72 | 582.76  | 463.50 | 736.41  | 956.76  | 767.92  | 1202.26 | 599.25 | 478.71 | 750.96  |
| Southern Latin America       | 850.06  | 681.47  | 1074.46 | 620.96  | 491.30 | 785.88  | 721.30  | 563.95  | 915.07  | 514.42 | 403.38 | 655.19  |
| Southern Sub-Saharan Africa  | 891.21  | 696.19  | 1124.96 | 642.49  | 499.62 | 808.31  | 864.36  | 674.75  | 1091.08 | 542.55 | 425.12 | 684.92  |
| Tropical Latin America       | 690.38  | 559.34  | 851.78  | 411.99  | 339.53 | 505.28  | 636.92  | 514.39  | 789.46  | 382.03 | 312.82 | 472.13  |
| Western Europe               | 885.49  | 715.83  | 1077.81 | 624.96  | 509.21 | 757.02  | 693.11  | 574.34  | 830.22  | 488.09 | 405.60 | 583.42  |
| Western Sub-Saharan Africa   | 675.39  | 532.58  | 847.80  | 522.06  | 411.12 | 658.54  | 728.99  | 569.09  | 920.63  | 551.20 | 434.55 | 701.13  |

**Table S4.** The age-standardized rates (ASRs) of years lived with disabilities (YLDs) per 100,000 populations for heart failure in 1990 and 2019 globally and in 21 Global Burden of Diseases (GBD) regions by sex

| Regions                    | 1990                          |       |        |                  |       |        | 2019             |       |        |                  |       |       |
|----------------------------|-------------------------------|-------|--------|------------------|-------|--------|------------------|-------|--------|------------------|-------|-------|
|                            | Males                         |       |        | Females          |       |        | Males            |       |        | Females          |       |       |
|                            | 95% uncertainty interval (UI) |       |        | 95% UI           |       |        | 95% UI           |       |        | 95% UI           |       |       |
|                            | ASRs per 100,000              | lower | upper  | ASRs per 100,000 | lower | upper  | ASRs per 100,000 | lower | upper  | ASRs per 100,000 | lower | upper |
| Global                     | 77.38                         | 50.15 | 111.97 | 61.44            | 39.63 | 88.87  | 70.58            | 45.81 | 101.35 | 57.99            | 37.72 | 83.46 |
| Andean Latin America       | 45.31                         | 28.60 | 65.88  | 29.43            | 18.63 | 42.40  | 47.83            | 30.25 | 69.25  | 30.71            | 19.25 | 44.76 |
| Australasia                | 114.19                        | 73.82 | 165.71 | 97.30            | 61.93 | 142.04 | 77.67            | 49.56 | 113.63 | 59.54            | 39.45 | 86.60 |
| Caribbean                  | 62.84                         | 39.77 | 90.81  | 36.34            | 23.22 | 52.57  | 61.26            | 39.04 | 89.23  | 35.22            | 22.39 | 51.33 |
| Central Asia               | 58.55                         | 36.77 | 83.88  | 47.31            | 30.01 | 68.91  | 56.38            | 35.76 | 81.55  | 42.82            | 27.26 | 61.78 |
| Central Europe             | 81.69                         | 52.14 | 117.52 | 62.81            | 40.39 | 90.75  | 77.32            | 51.22 | 110.71 | 55.13            | 36.09 | 79.17 |
| Central Latin America      | 53.50                         | 34.52 | 77.18  | 38.42            | 24.83 | 56.21  | 49.48            | 31.45 | 71.71  | 34.09            | 22.03 | 49.50 |
| Central Sub-Saharan Africa | 51.90                         | 32.09 | 77.42  | 38.40            | 23.25 | 57.23  | 51.85            | 31.25 | 77.03  | 37.62            | 22.83 | 55.92 |

|                              |        |       |        |       |           |            |        |           |            |       |           |            |
|------------------------------|--------|-------|--------|-------|-----------|------------|--------|-----------|------------|-------|-----------|------------|
| East Asia                    | 96.97  | 62.64 | 142.02 | 89.35 | 57.7<br>8 | 130.9<br>3 | 89.16  | 57.1<br>6 | 129.9<br>7 | 89.65 | 58.2<br>5 | 131.7<br>2 |
| Eastern Europe               | 52.46  | 34.28 | 75.79  | 48.19 | 31.3<br>6 | 69.15      | 51.83  | 33.8<br>6 | 74.10      | 48.38 | 31.2<br>0 | 69.88      |
| Eastern Sub-Saharan Africa   | 85.36  | 54.80 | 122.80 | 51.56 | 33.1<br>0 | 75.37      | 94.38  | 60.6<br>6 | 135.6<br>3 | 54.37 | 34.8<br>0 | 79.99      |
| High-income Asia Pacific     | 58.59  | 38.09 | 85.05  | 45.65 | 29.6<br>9 | 66.49      | 46.93  | 31.4<br>6 | 66.57      | 34.25 | 23.0<br>8 | 48.26      |
| High-income North America    | 138.53 | 90.65 | 200.14 | 99.51 | 64.7<br>0 | 143.0<br>8 | 121.62 | 81.7<br>6 | 170.6<br>0 | 90.06 | 60.0<br>9 | 126.1<br>8 |
| North Africa and Middle East | 82.03  | 51.34 | 119.51 | 60.37 | 38.2<br>8 | 87.96      | 79.41  | 50.0<br>9 | 114.0<br>3 | 61.81 | 40.3<br>4 | 89.58      |
| Oceania                      | 78.37  | 49.83 | 113.15 | 66.00 | 42.6<br>5 | 96.93      | 80.14  | 50.5<br>4 | 115.9<br>0 | 66.88 | 43.3<br>2 | 97.47      |
| South Asia                   | 34.40  | 22.11 | 49.89  | 30.99 | 19.8<br>8 | 45.15      | 35.94  | 23.2<br>2 | 52.08      | 32.99 | 21.0<br>4 | 48.09      |
| Southeast Asia               | 80.97  | 51.77 | 117.60 | 51.49 | 33.1<br>4 | 74.55      | 85.64  | 54.9<br>9 | 124.4<br>7 | 53.42 | 34.5<br>5 | 77.06      |
| Southern Latin America       | 69.47  | 44.29 | 101.13 | 52.56 | 33.3<br>3 | 76.38      | 62.23  | 40.0<br>7 | 92.15      | 45.27 | 28.6<br>7 | 66.12      |
| Southern Sub-Saharan Africa  | 79.35  | 50.34 | 116.18 | 57.30 | 36.4<br>8 | 84.53      | 77.21  | 48.8<br>8 | 112.0<br>6 | 48.56 | 30.9<br>4 | 71.66      |
| Tropical Latin America       | 58.74  | 37.70 | 85.95  | 35.54 | 23.0<br>0 | 52.02      | 55.30  | 35.7<br>3 | 81.10      | 33.55 | 21.7<br>0 | 49.28      |
| Western Europe               | 80.36  | 51.39 | 117.59 | 56.72 | 36.6<br>9 | 82.89      | 62.98  | 40.7<br>3 | 90.54      | 44.36 | 29.1<br>7 | 63.74      |

|                            |       |       |       |       |           |       |       |           |       |       |           |       |
|----------------------------|-------|-------|-------|-------|-----------|-------|-------|-----------|-------|-------|-----------|-------|
| Western Sub-Saharan Africa | 60.02 | 38.27 | 86.59 | 46.38 | 30.0<br>7 | 67.82 | 64.99 | 41.4<br>6 | 95.66 | 49.20 | 31.5<br>4 | 72.76 |
|----------------------------|-------|-------|-------|-------|-----------|-------|-------|-----------|-------|-------|-----------|-------|

**Figure S1.** Global age-standardized point prevalence rate of treated heart failure per 100,000 population in 2019. Visualization using the Global Burden of Diseases (GBD) Compare Tool (<https://www.healthdata.org/data-visualization/gbd-compare>).

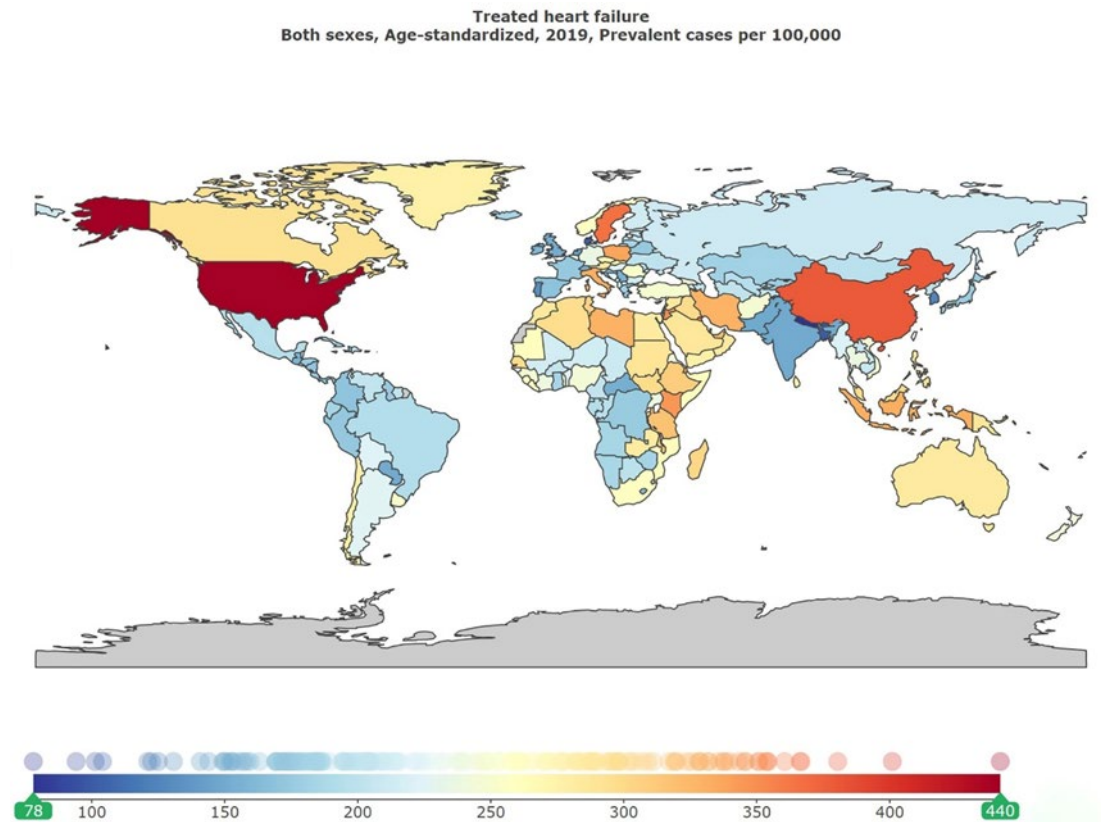

**Figure S2.** Global age-standardized point prevalence rate of mild heart failure per 100,000 population in 2019. Visualization using the Global Burden of Diseases (GBD) Compare Tool (<https://www.healthdata.org/data-visualization/gbd-compare>).

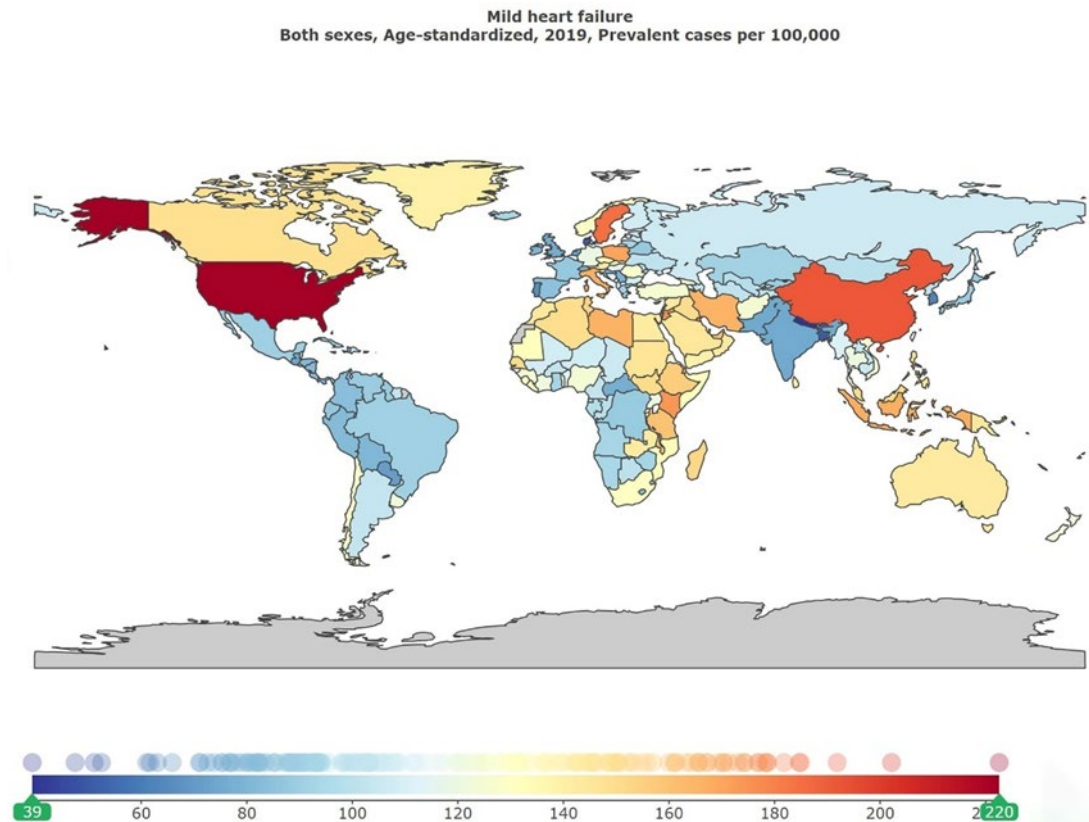

**Figure S3.** Global age-standardized point prevalence rate of moderate heart failure per 100,000 population in 2019. Visualization using the Global Burden of Diseases (GBD) Compare Tool (<https://www.healthdata.org/data-visualization/gbd-compare>).

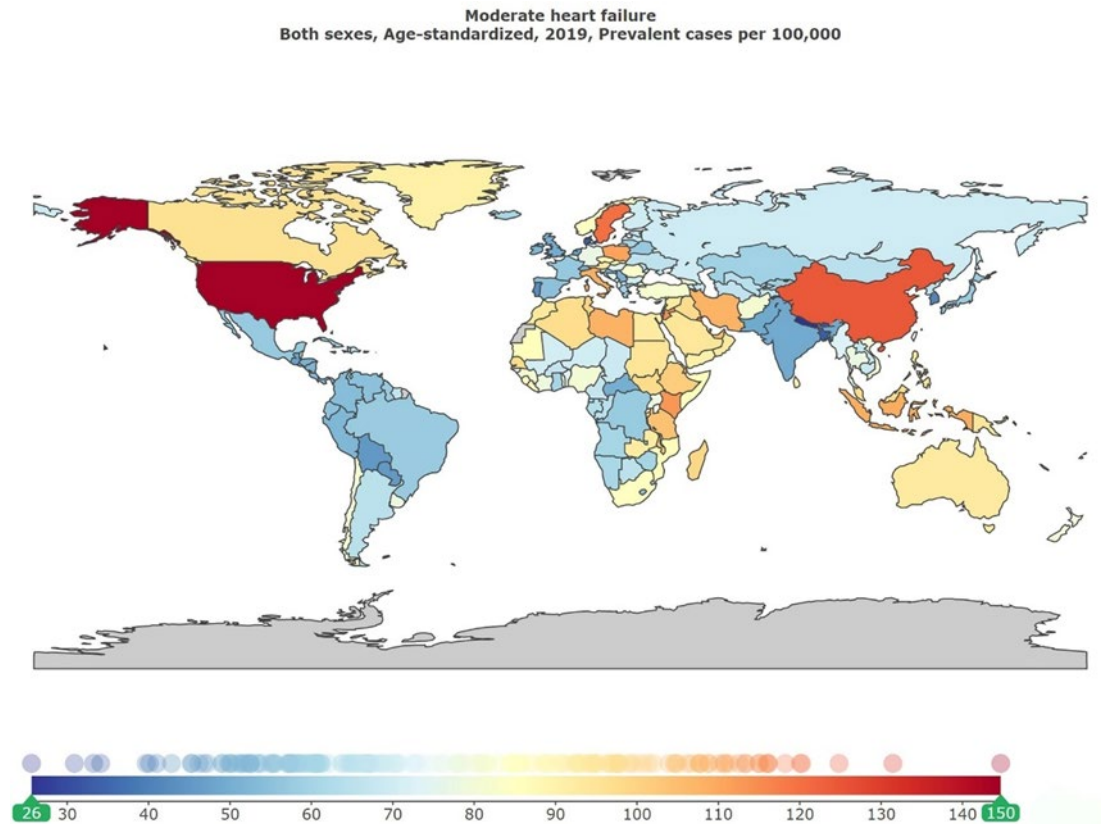

**Figure S4.** Global age-standardized point prevalence rate of severe heart failure per 100,000 population in 2019. Visualization using the Global Burden of Diseases (GBD) Compare Tool (<https://www.healthdata.org/data-visualization/gbd-compare>).

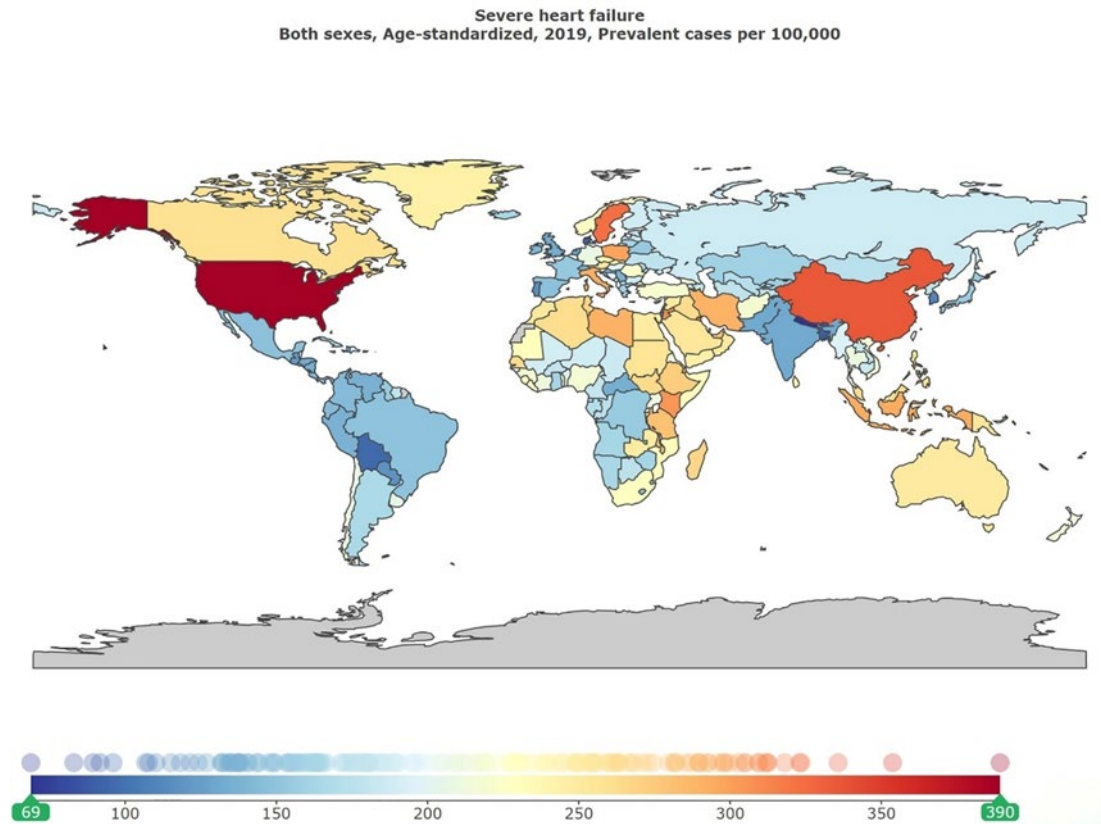



**Figure S5.** The Joinpoint regression analysis showing annual percentage (APC) change for age-standardized prevalence rate of treated heart failure globally from 1990 to 2019.

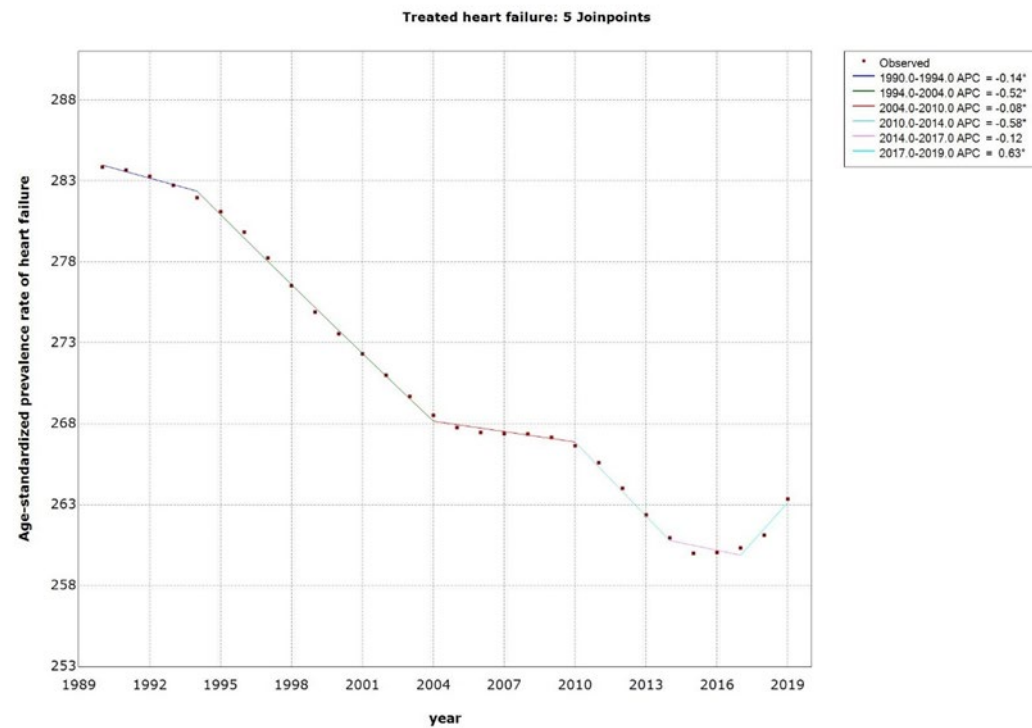

\* Indicates that the Annual Percent Change (APC) is significantly different from zero at the alpha = 0.05 level.  
Final Selected Model: 5 Joinpoints.

**Figure S6.** The Joinpoint regression analysis showing annual percentage (APC) change for age-standardized prevalence rate of mild heart failure globally from 1990 to 2019.

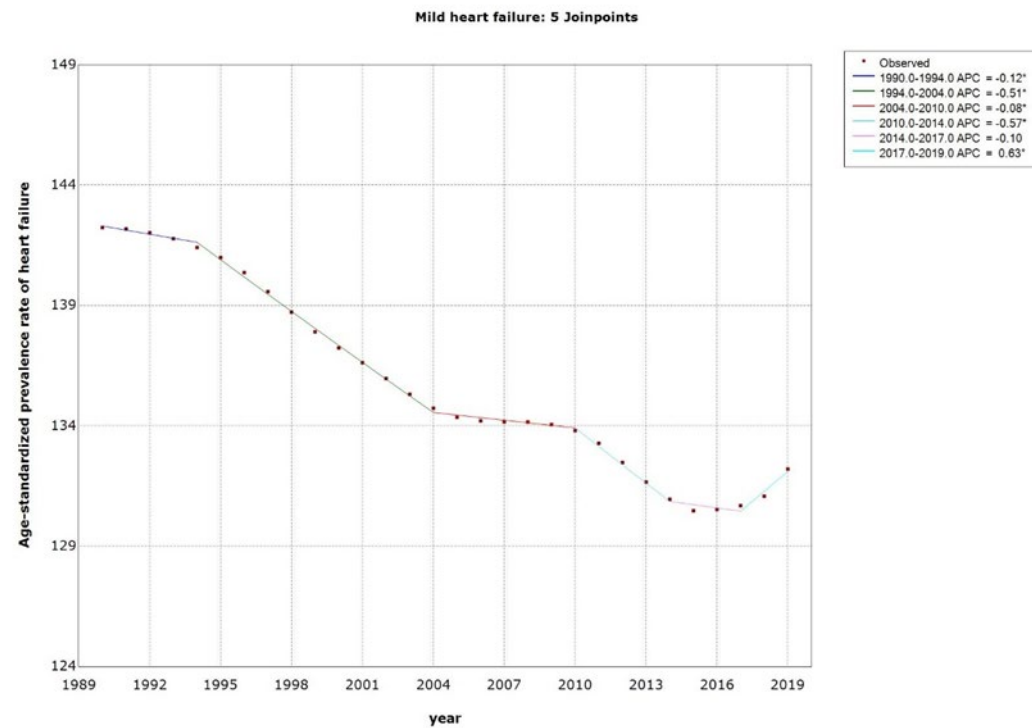

\* Indicates that the Annual Percent Change (APC) is significantly different from zero at the alpha = 0.05 level.  
Final Selected Model: 5 Joinpoints.

**Figure S7.** The Joinpoint regression analysis showing annual percentage (APC) change for age-standardized prevalence rate of moderate heart failure globally from 1990 to 2019.

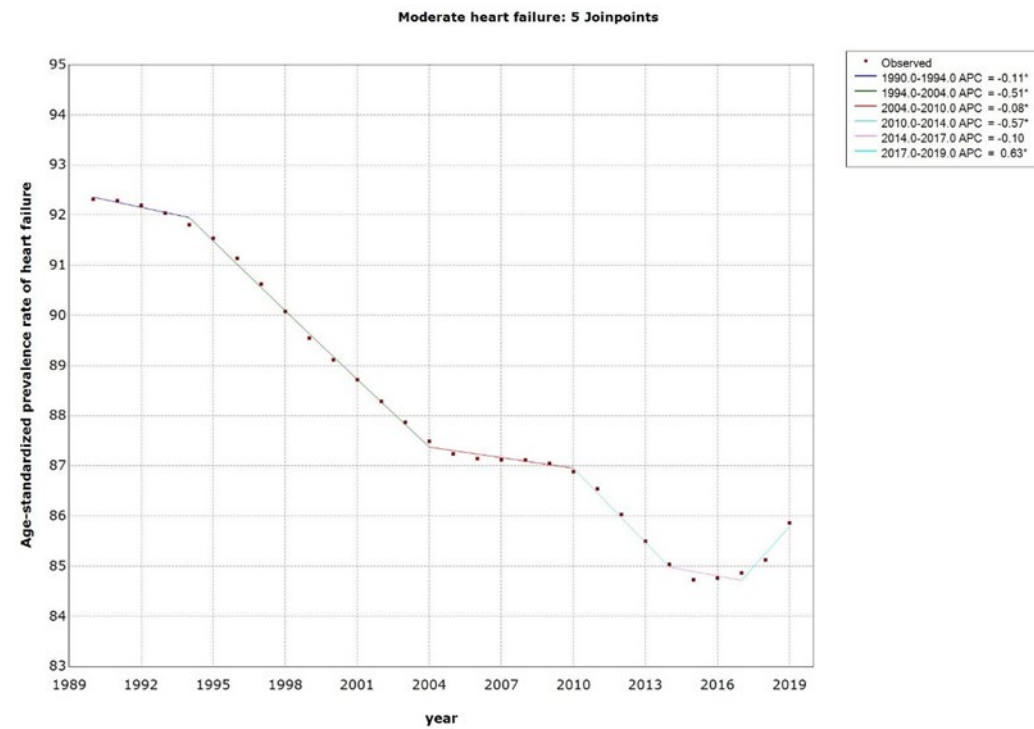

\* Indicates that the Annual Percent Change (APC) is significantly different from zero at the alpha = 0.05 level.  
Final Selected Model: 5 Joinpoints.

**Figure S8.** The Joinpoint regression analysis showing annual percentage (APC) change for age-standardized prevalence rate of severe heart failure globally from 1990 to 2019.

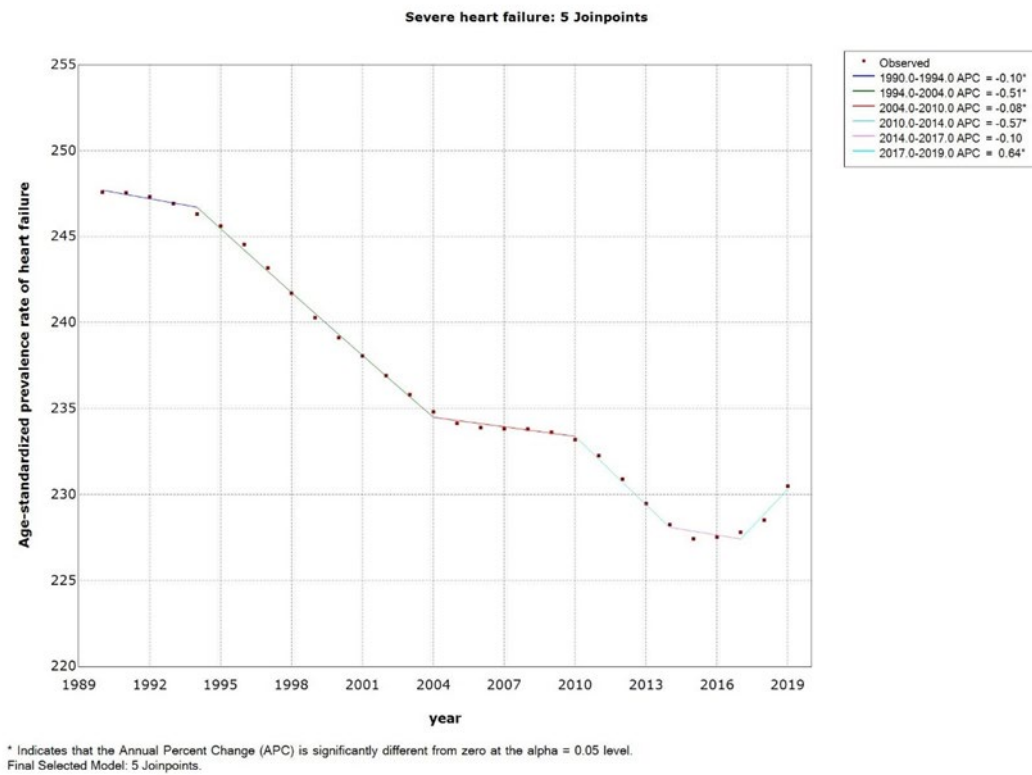

**Figure S9.** The Joinpoint regression analysis showing annual percentage (APC) change for age-standardized prevalence rate of heart failure in High Socio-demographic Index (SDI) regions from 1990 to 2019.

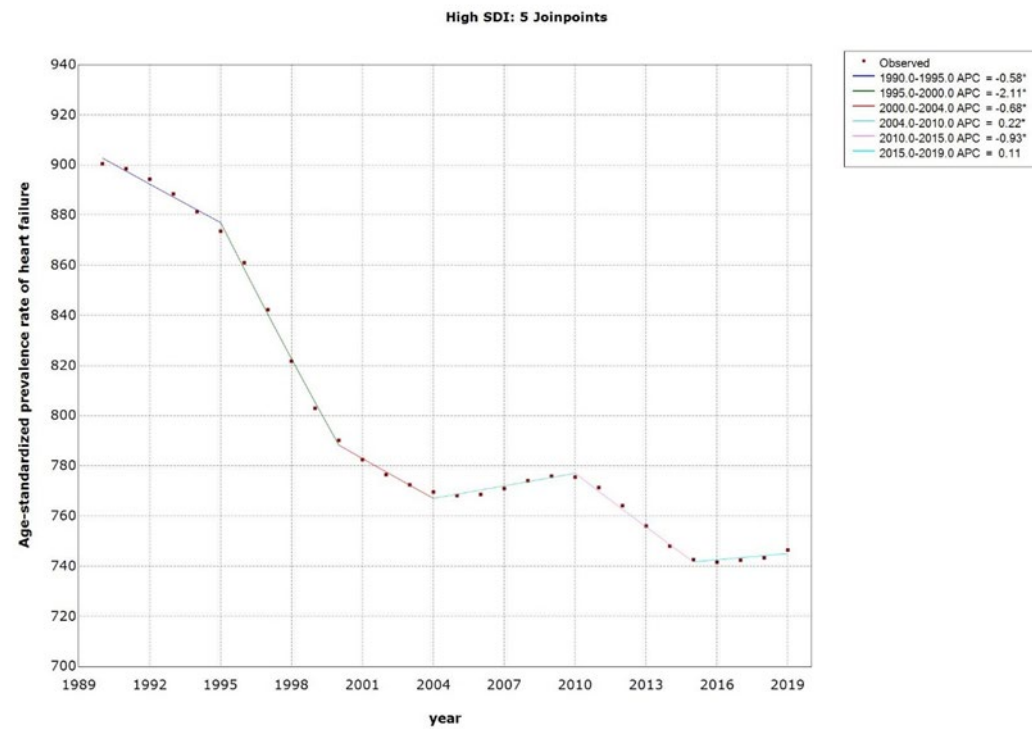

\* Indicates that the Annual Percent Change (APC) is significantly different from zero at the alpha = 0.05 level.  
Final Selected Model: 5 Joinpoints.

**Figure S10.** The Joinpoint regression analysis showing annual percentage (APC) change for age-standardized prevalence rate of heart failure in High-middle Socio-demographic Index (SDI) regions from 1990 to 2019.

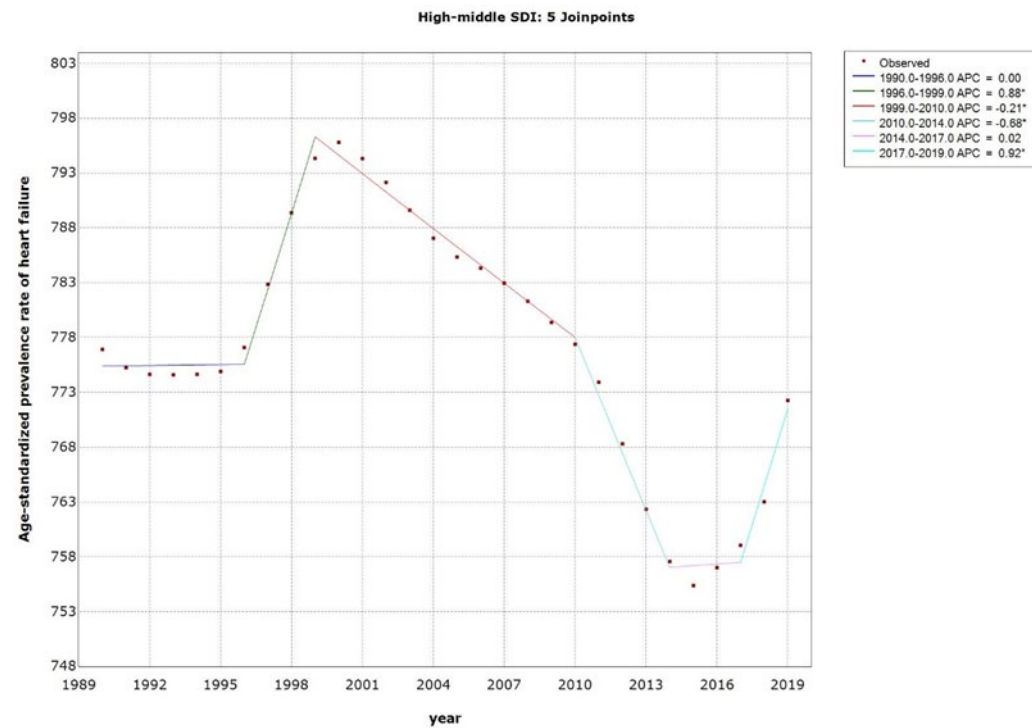

\* Indicates that the Annual Percent Change (APC) is significantly different from zero at the alpha = 0.05 level.  
Final Selected Model: 5 Joinpoints.

**Figure S11.** The Joinpoint regression analysis showing annual percentage (APC) change for age-standardized prevalence rate of heart failure in Middle Socio-demographic Index (SDI) regions from 1990 to 2019.

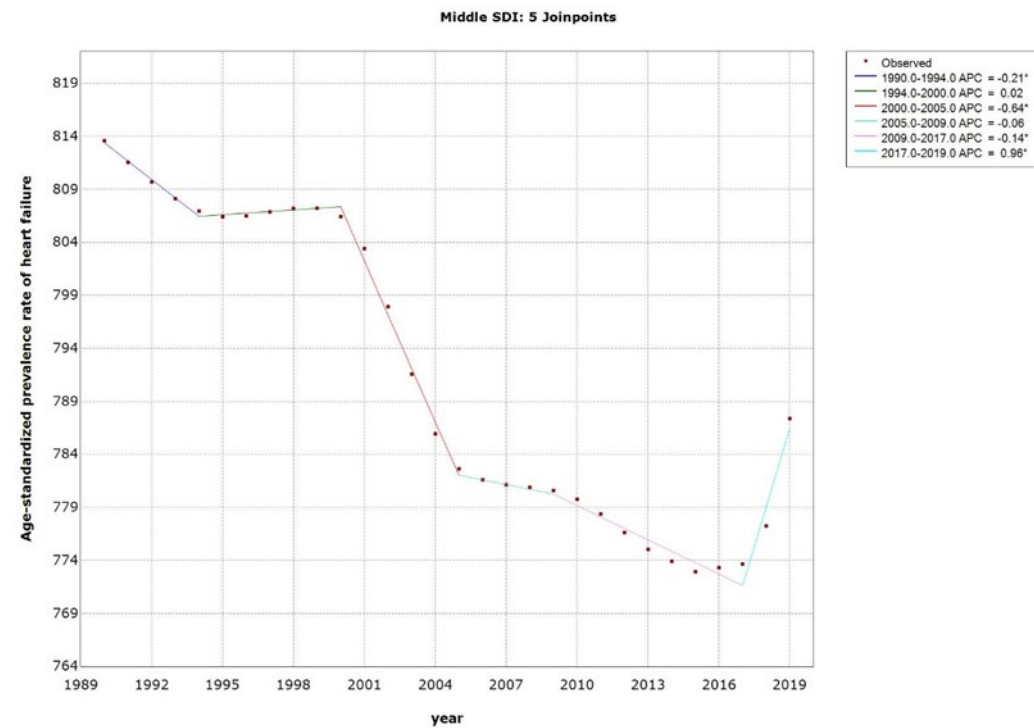

\* Indicates that the Annual Percent Change (APC) is significantly different from zero at the alpha = 0.05 level.  
Final Selected Model: 4 Joinpoints.

**Figure S12.** The Joinpoint regression analysis showing annual percentage (APC) change for age-standardized prevalence rate of heart failure in Low-middle Socio-demographic Index (SDI) regions from 1990 to 2019.

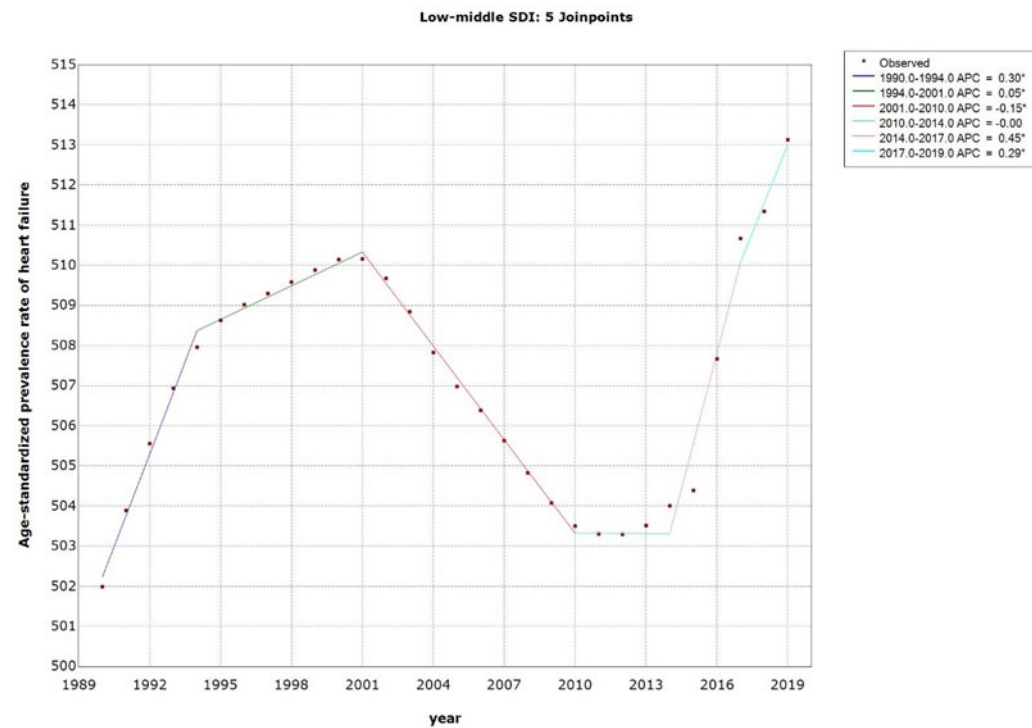

\* Indicates that the Annual Percent Change (APC) is significantly different from zero at the alpha = 0.05 level.  
Final Selected Model: 4 Joinpoints.



**Figure S13.** The Joinpoint regression analysis showing annual percentage (APC) change for age-standardized prevalence rate of heart failure in Low Socio-demographic Index (SDI) regions from 1990 to 2019.

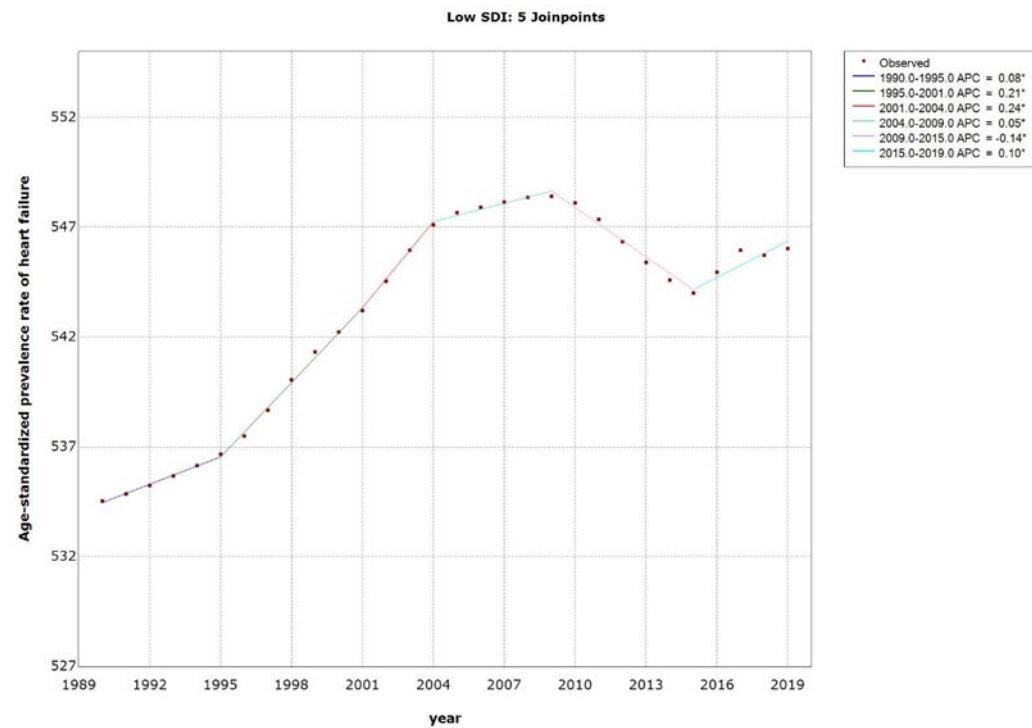

\* Indicates that the Annual Percent Change (APC) is significantly different from zero at the alpha = 0.05 level.  
Final Selected Model: 4 Joinpoints.

**Figure S14.** The Joinpoint regression analysis showing annual percentage (APC) change for age-standardized prevalence rate of heart failure in Andean Latin America from 1990 to 2019.

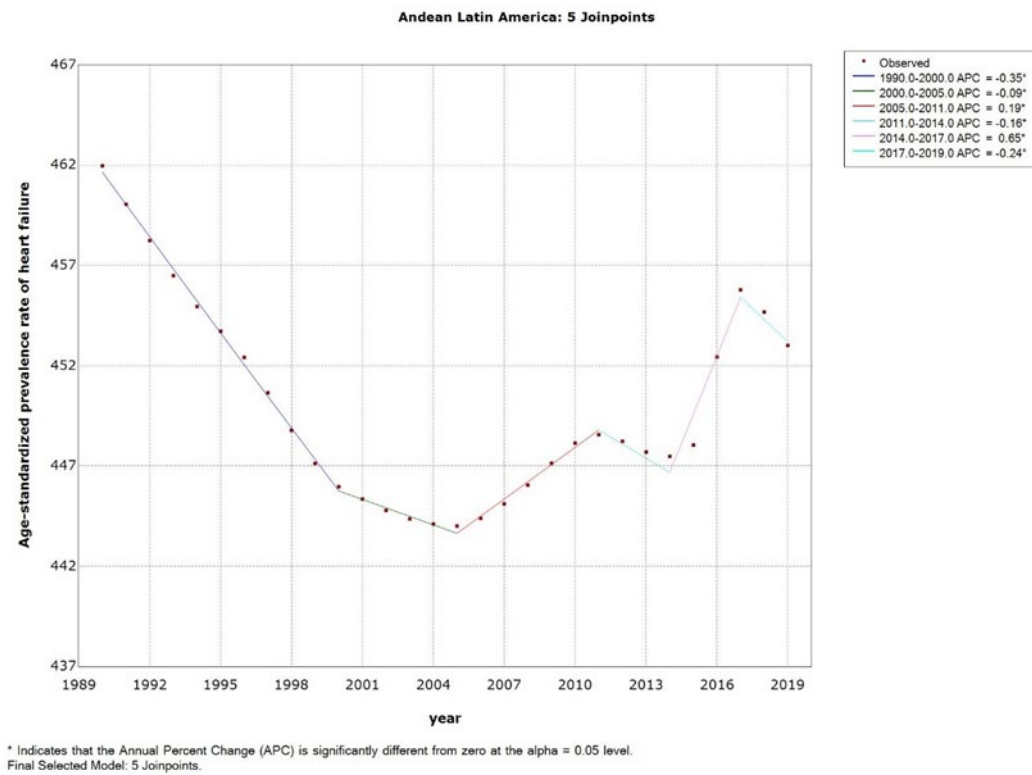

**Figure S15.** The Joinpoint regression analysis showing annual percentage (APC) change for age-standardized prevalence rate of heart failure in Australasia from 1990 to 2019.

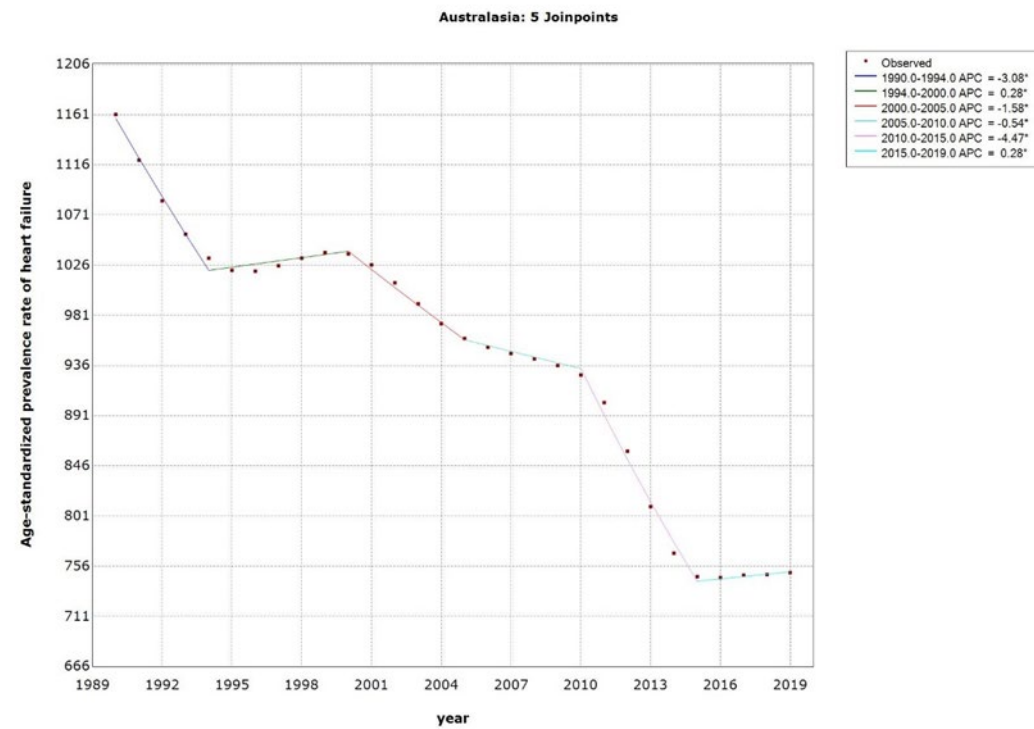

\* Indicates that the Annual Percent Change (APC) is significantly different from zero at the alpha = 0.05 level.  
Final Selected Model: 5 Joinpoints.

**Figure S16.** The Joinpoint regression analysis showing annual percentage (APC) change for age-standardized prevalence rate of heart failure in Caribbean from 1990 to 2019.

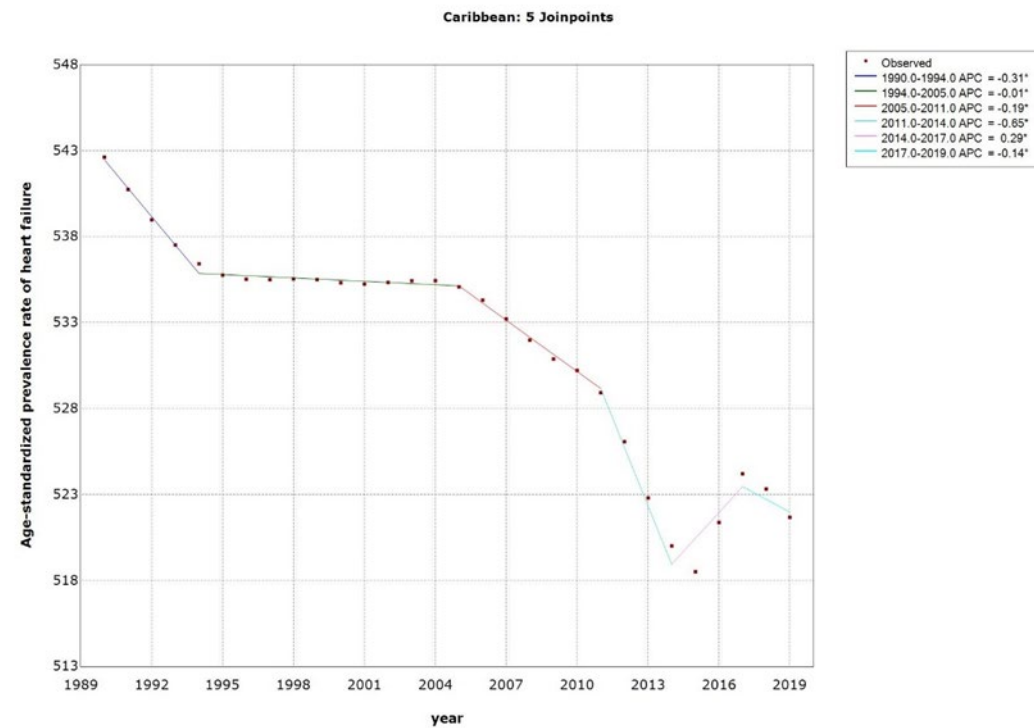

\* Indicates that the Annual Percent Change (APC) is significantly different from zero at the alpha = 0.05 level.  
Final Selected Model: 5 Joinpoints.

**Figure S17.** The Joinpoint regression analysis showing annual percentage (APC) change for age-standardized prevalence rate of heart failure in Central Asia from 1990 to 2019.

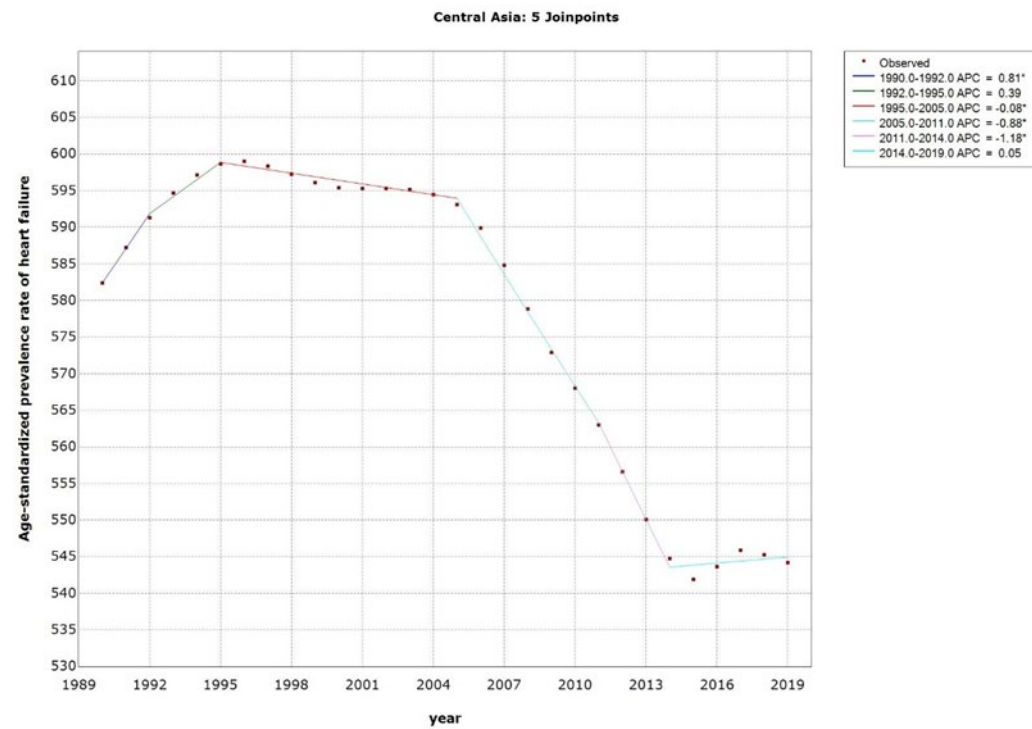

\* Indicates that the Annual Percent Change (APC) is significantly different from zero at the alpha = 0.05 level.  
Final Selected Model: 3 Joinpoints.

**Figure S18.** The Joinpoint regression analysis showing annual percentage (APC) change for age-standardized prevalence rate of heart failure in Central Europe from 1990 to 2019.

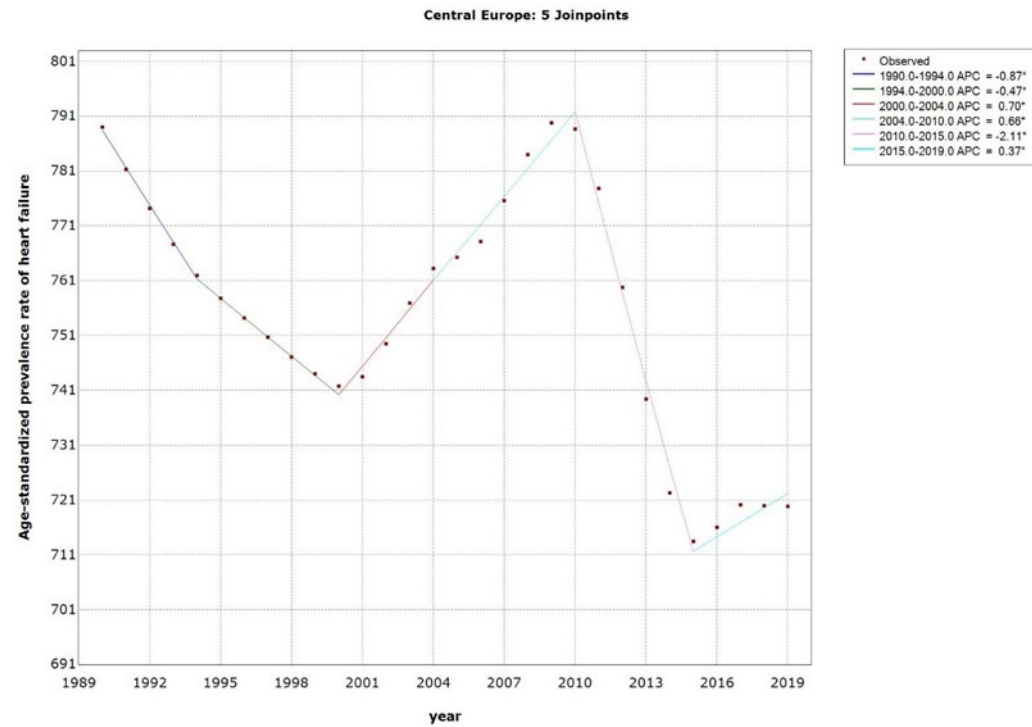

\* Indicates that the Annual Percent Change (APC) is significantly different from zero at the alpha = 0.05 level.  
Final Selected Model: 4 Joinpoints.

**Figure S19.** The Joinpoint regression analysis showing annual percentage (APC) change for age-standardized prevalence rate of heart failure in Central Latin America from 1990 to 2019.

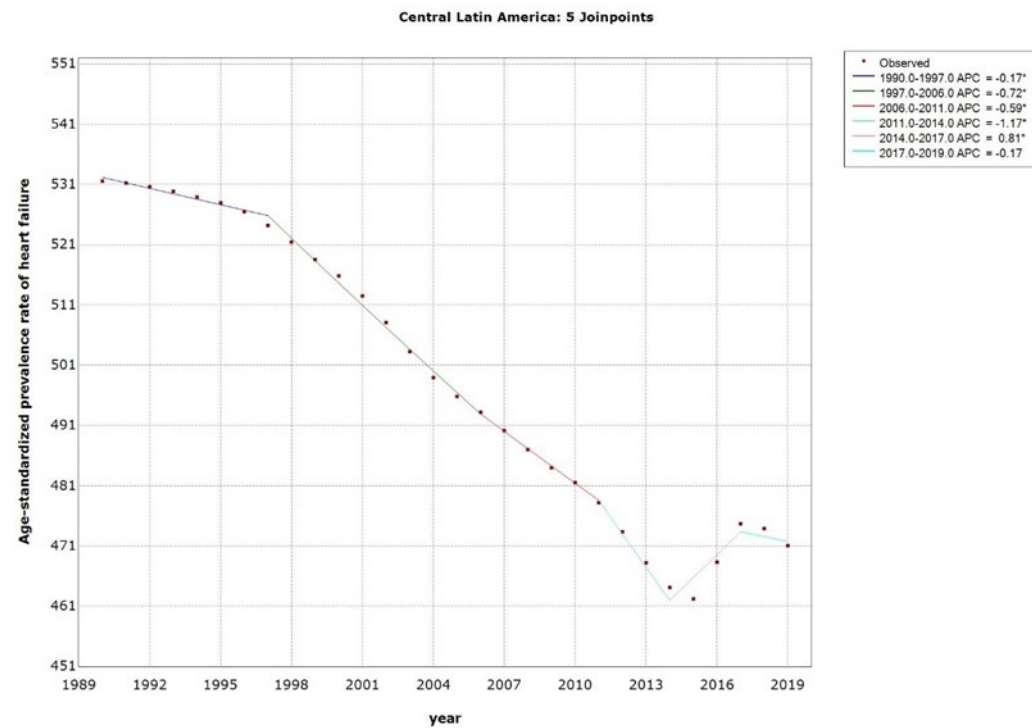

\* Indicates that the Annual Percent Change (APC) is significantly different from zero at the alpha = 0.05 level.  
Final Selected Model: 4 Joinpoints.

**Figure S20.** The Joinpoint regression analysis showing annual percentage (APC) change for age-standardized prevalence rate of heart failure in Central Sub-Saharan Africa from 1990 to 2019.

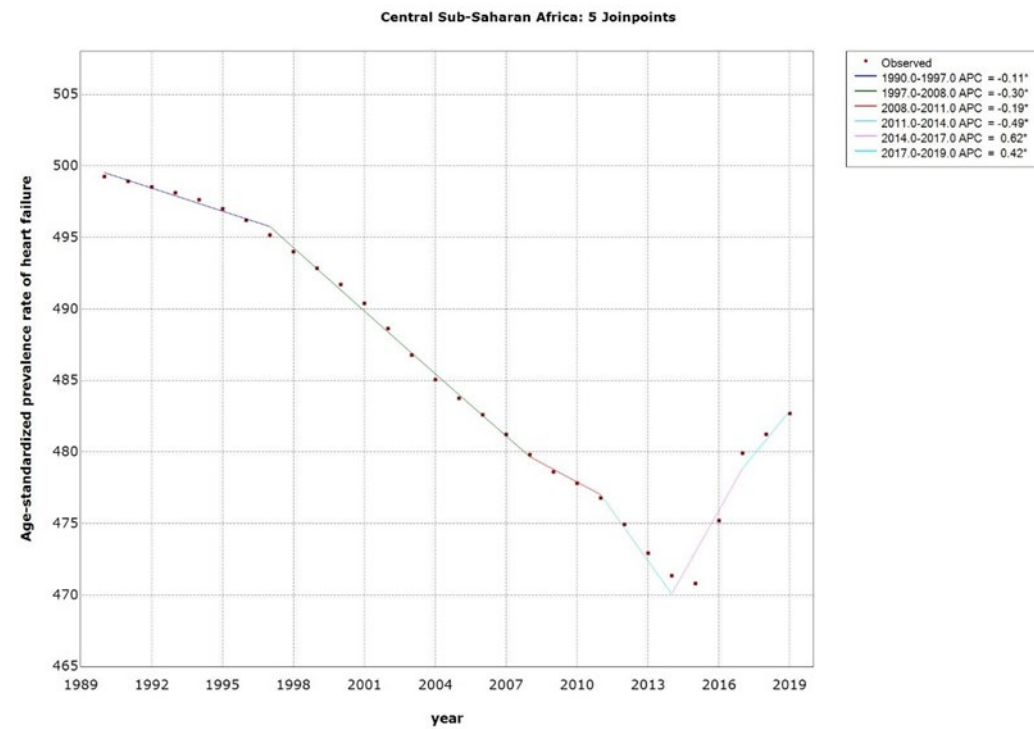

\* Indicates that the Annual Percent Change (APC) is significantly different from zero at the alpha = 0.05 level.  
Final Selected Model: 2 Joinpoints.



**Figure S21.** The Joinpoint regression analysis showing annual percentage (APC) change for age-standardized prevalence rate of heart failure in East Asia from 1990 to 2019.

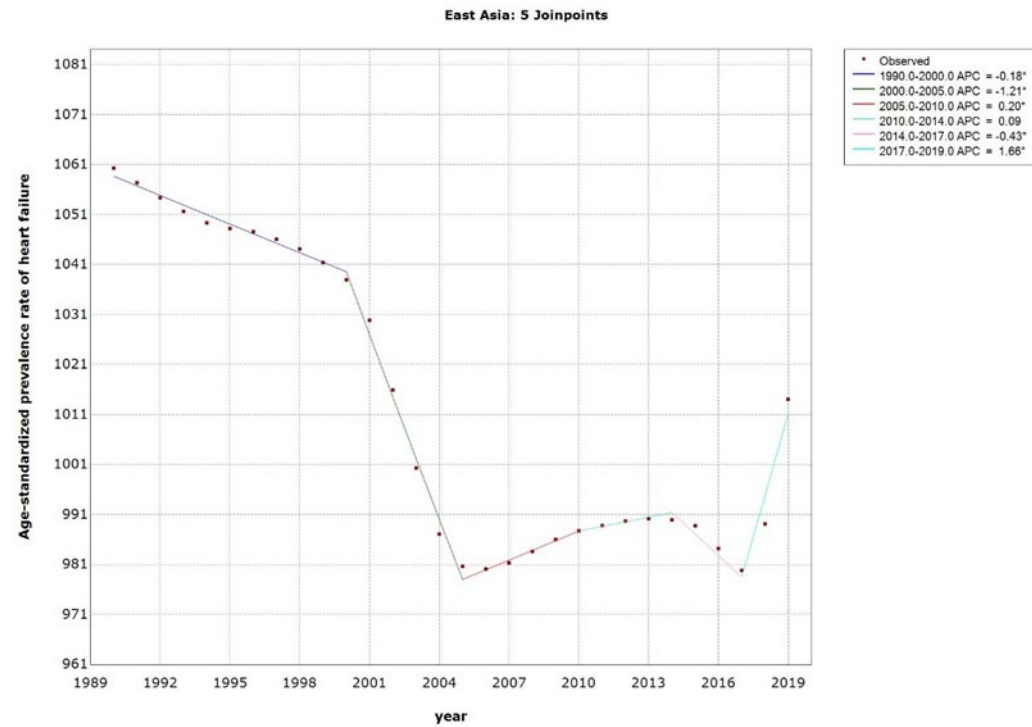

\* Indicates that the Annual Percent Change (APC) is significantly different from zero at the alpha = 0.05 level.  
Final Selected Model: 4 Joinpoints.

**Figure S22.** The Joinpoint regression analysis showing annual percentage (APC) change for age-standardized prevalence rate of heart failure in Eastern Europe from 1990 to 2019.

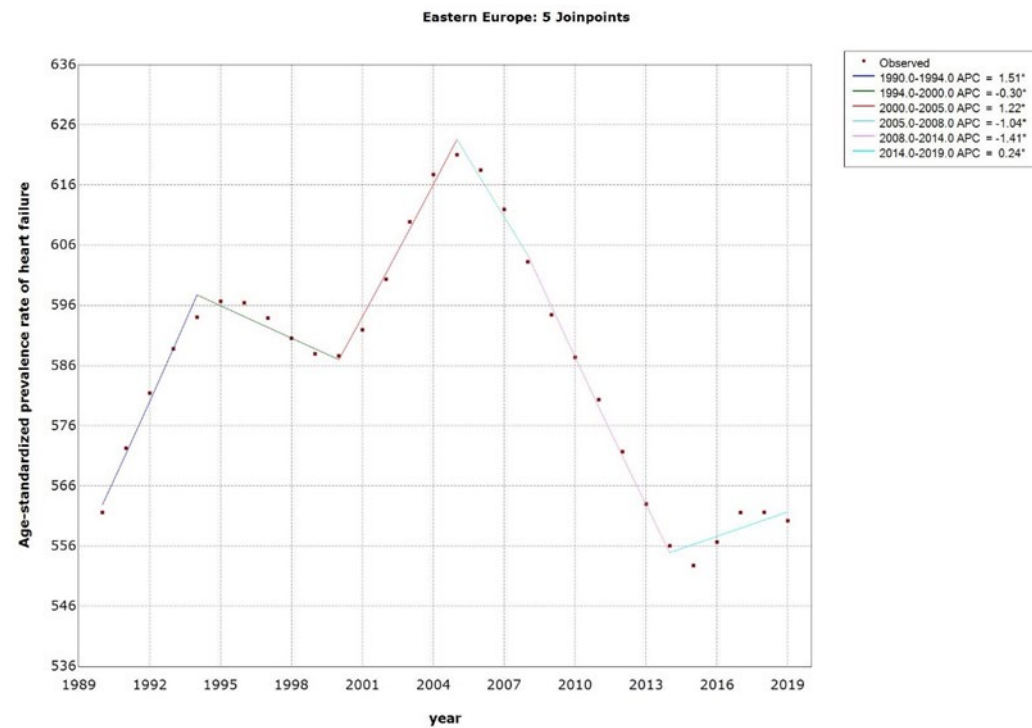

\* Indicates that the Annual Percent Change (APC) is significantly different from zero at the alpha = 0.05 level.  
Final Selected Model: 4 Joinpoints.

**Figure S23.** The Joinpoint regression analysis showing annual percentage (APC) change for age-standardized prevalence rate of heart failure in Eastern Sub-Saharan Africa from 1990 to 2019.

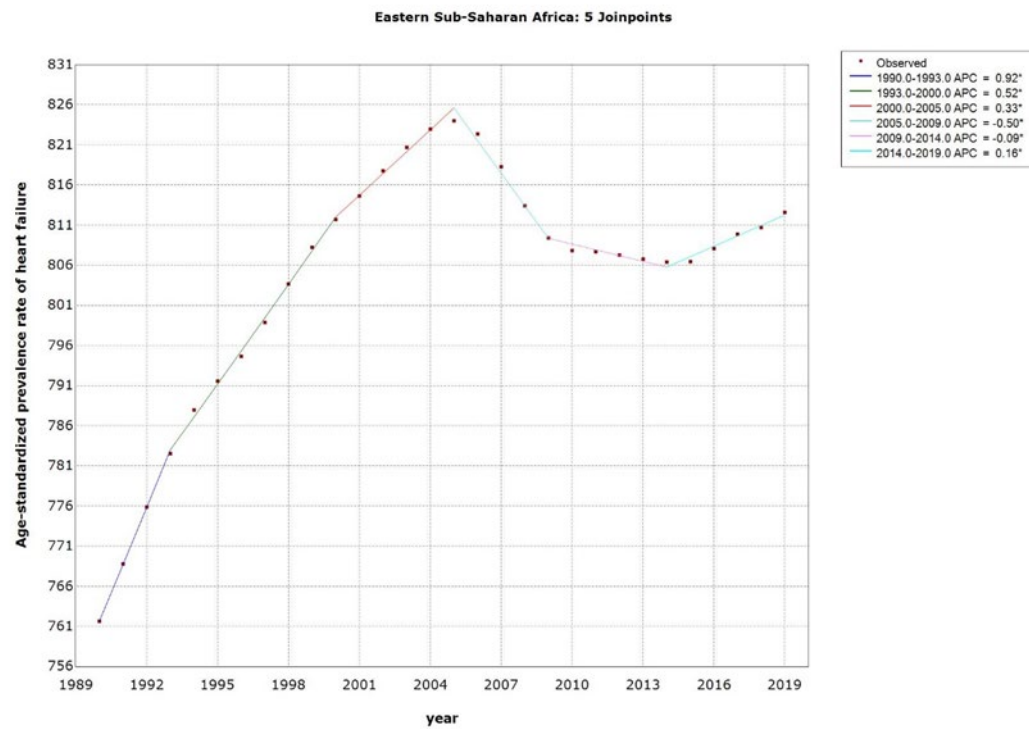

\* Indicates that the Annual Percent Change (APC) is significantly different from zero at the alpha = 0.05 level.  
Final Selected Model: 5 Joinpoints.

**Figure S24.** The Joinpoint regression analysis showing annual percentage (APC) change for age-standardized prevalence rate of heart failure in High-income Asia Pacific from 1990 to 2019.

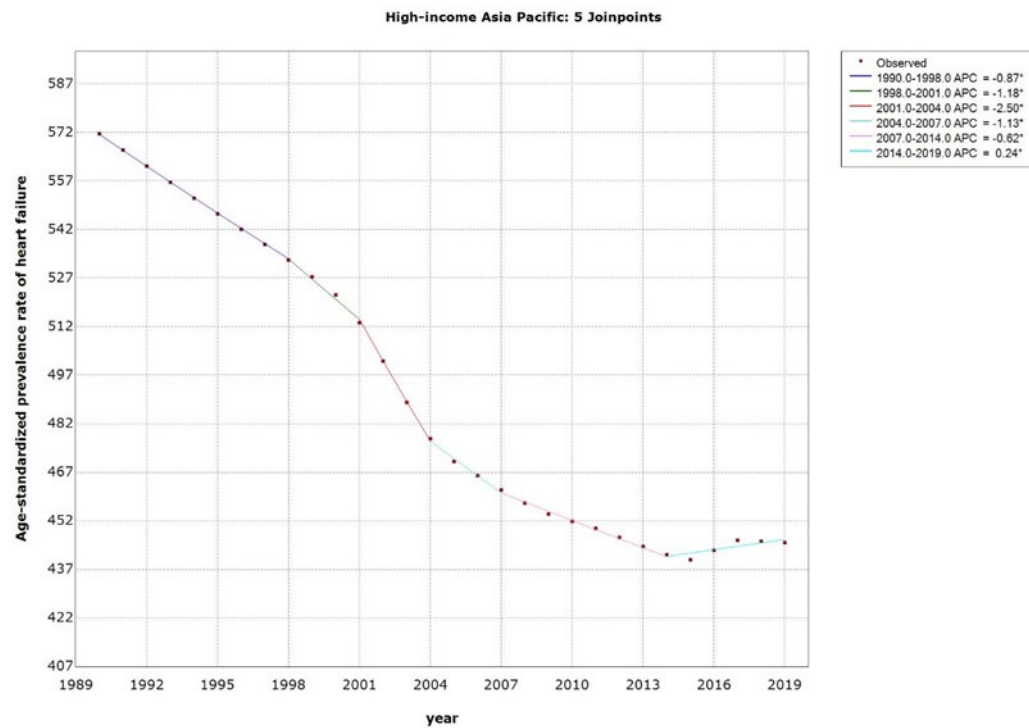

\* Indicates that the Annual Percent Change (APC) is significantly different from zero at the alpha = 0.05 level.  
Final Selected Model: 3 Joinpoints.

**Figure S25.** The Joinpoint regression analysis showing annual percentage (APC) change for age-standardized prevalence rate of heart failure in High-income North America from 1990 to 2019.

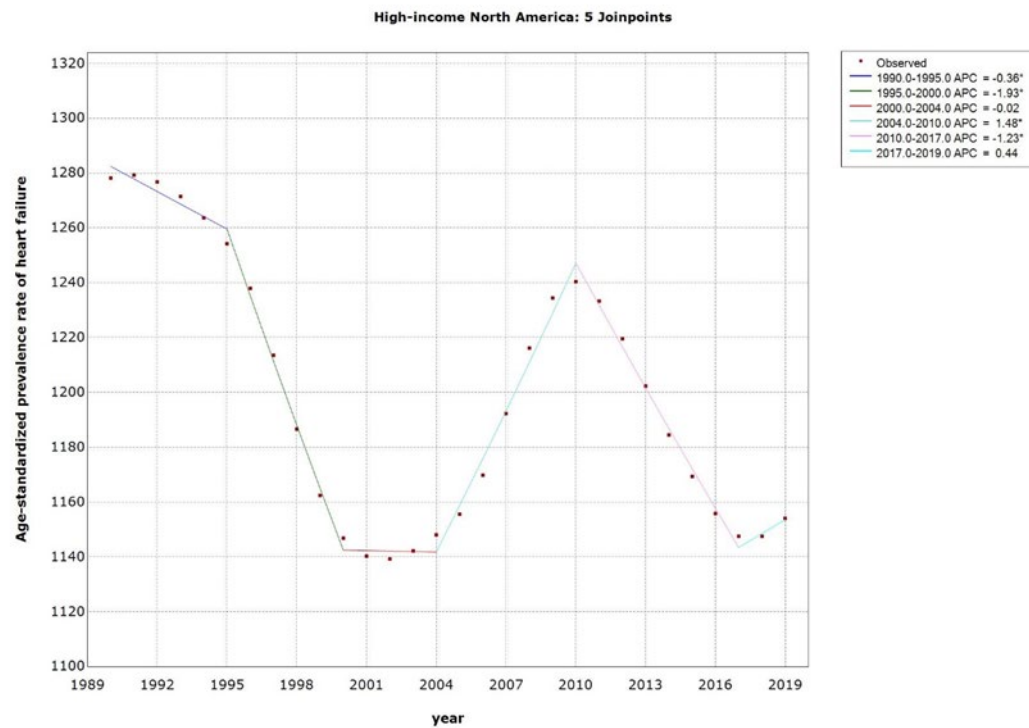

\* Indicates that the Annual Percent Change (APC) is significantly different from zero at the alpha = 0.05 level.  
Final Selected Model: 5 Joinpoints.

**Figure S26.** The Joinpoint regression analysis showing annual percentage (APC) change for age-standardized prevalence rate of heart failure in North Africa and Middle East from 1990 to 2019.

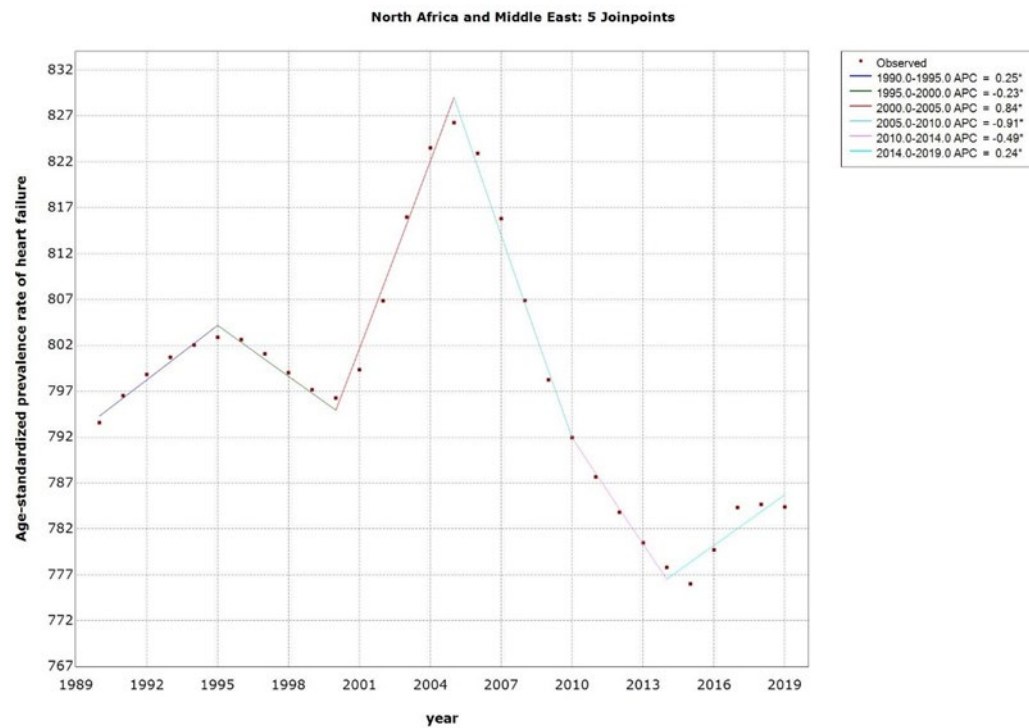

\* Indicates that the Annual Percent Change (APC) is significantly different from zero at the alpha = 0.05 level.  
Final Selected Model: 5 Joinpoints.

**Figure S27.** The Joinpoint regression analysis showing annual percentage (APC) change for age-standardized prevalence rate of heart failure in Oceania from 1990 to 2019.

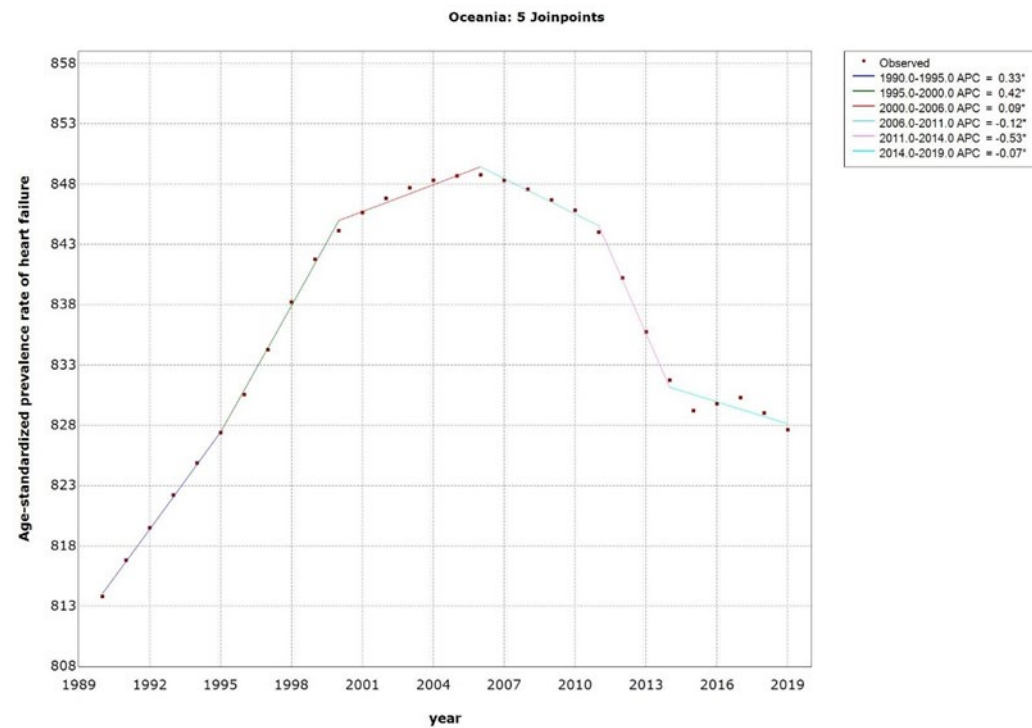

\* Indicates that the Annual Percent Change (APC) is significantly different from zero at the alpha = 0.05 level.  
Final Selected Model: 5 Joinpoints.

**Figure S28.** The Joinpoint regression analysis showing annual percentage (APC) change for age-standardized prevalence rate of heart failure in South Asia from 1990 to 2019.

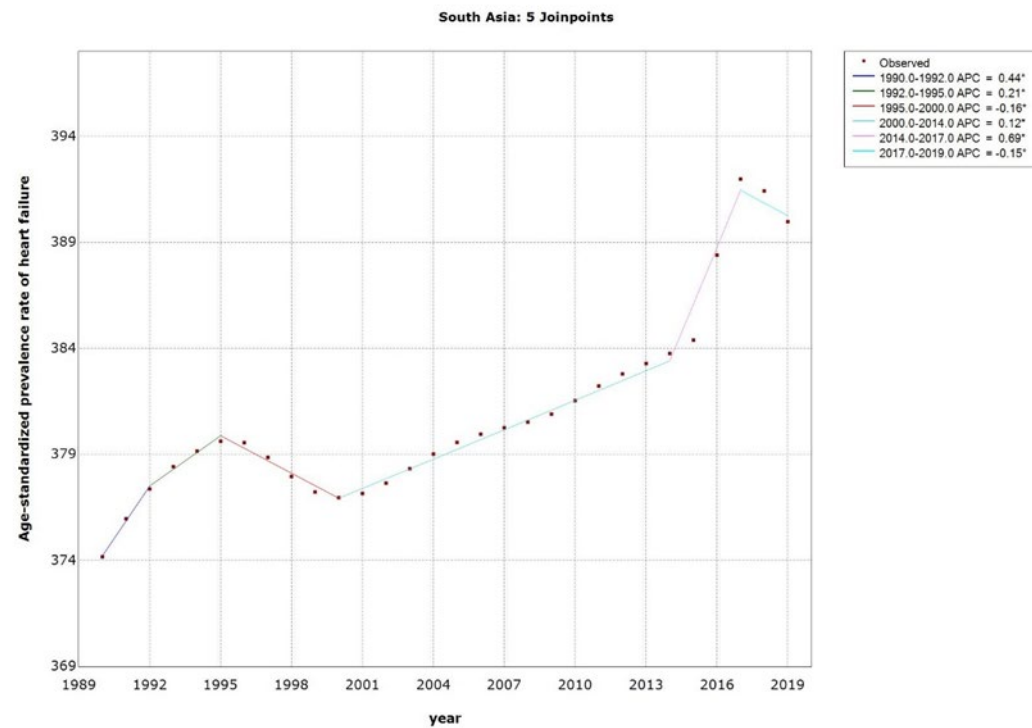

\* Indicates that the Annual Percent Change (APC) is significantly different from zero at the alpha = 0.05 level.  
Final Selected Model: 4 Joinpoints.



**Figure S29.** The Joinpoint regression analysis showing annual percentage (APC) change for age-standardized prevalence rate of heart failure in Southeast Asia from 1990 to 2019.

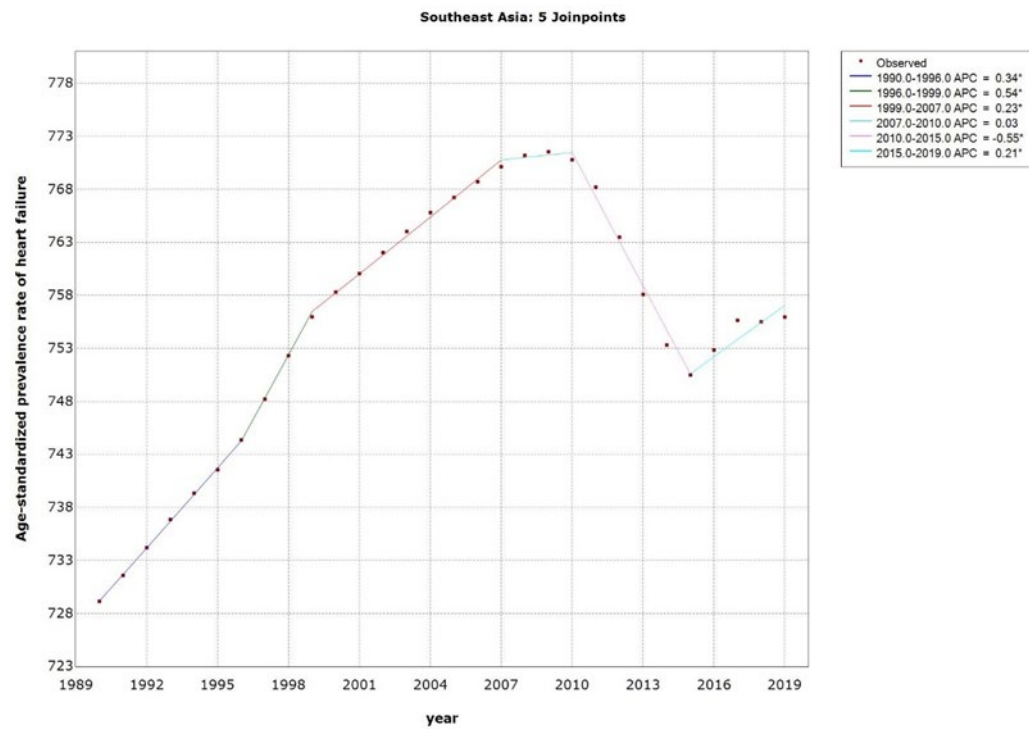

\* Indicates that the Annual Percent Change (APC) is significantly different from zero at the alpha = 0.05 level.  
Final Selected Model: 5 Joinpoints.

**Figure S30.** The Joinpoint regression analysis showing annual percentage (APC) change for age-standardized prevalence rate of heart failure in Southern Latin America from 1990 to 2019.

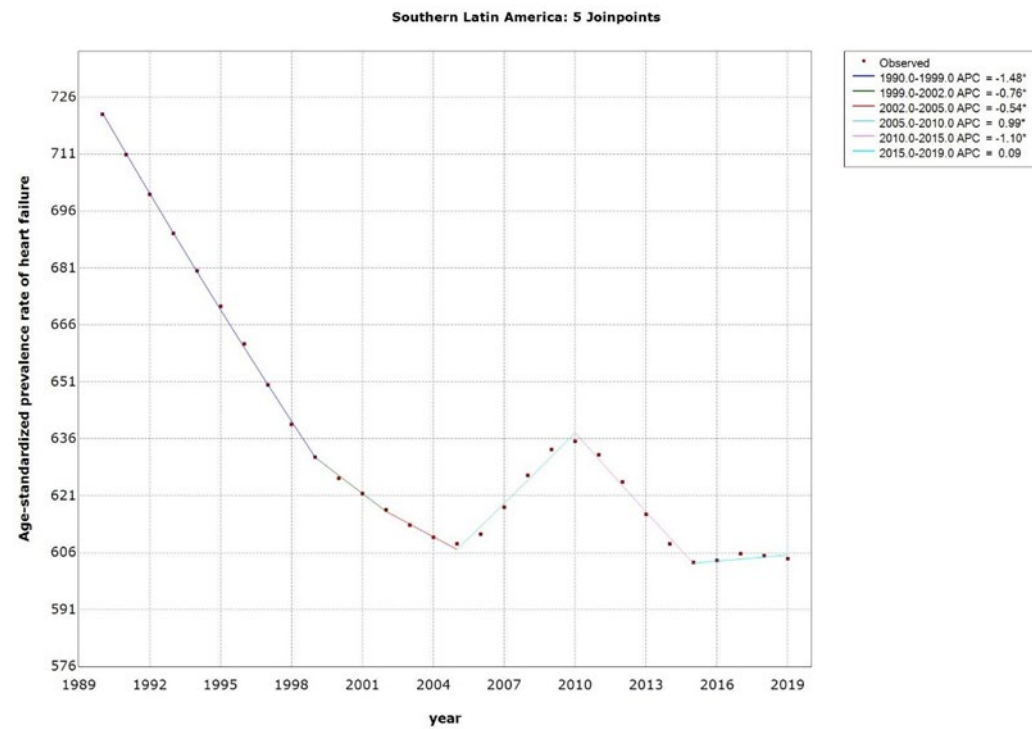

\* Indicates that the Annual Percent Change (APC) is significantly different from zero at the alpha = 0.05 level.  
Final Selected Model: 4 Joinpoints.

**Figure S31.** The Joinpoint regression analysis showing annual percentage (APC) change for age-standardized prevalence rate of heart failure in Southern Sub-Saharan Africa from 1990 to 2019.

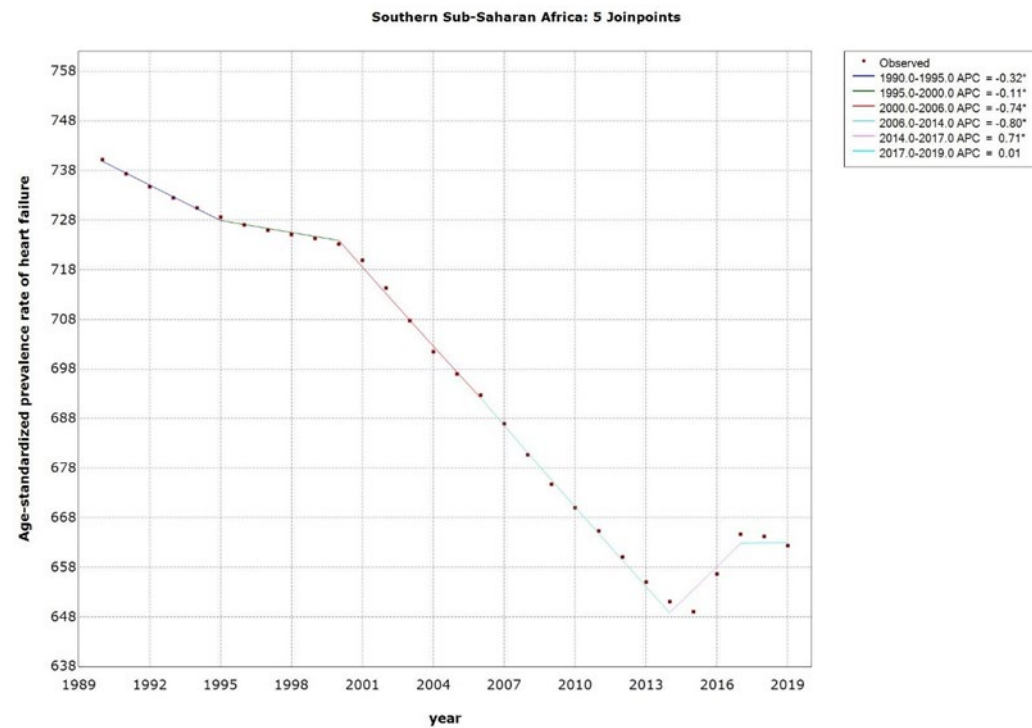

\* Indicates that the Annual Percent Change (APC) is significantly different from zero at the alpha = 0.05 level.  
Final Selected Model: 2 Joinpoints.

**Figure S32.** The Joinpoint regression analysis showing annual percentage (APC) change for age-standardized prevalence rate of heart failure in Tropical Latin America from 1990 to 2019.

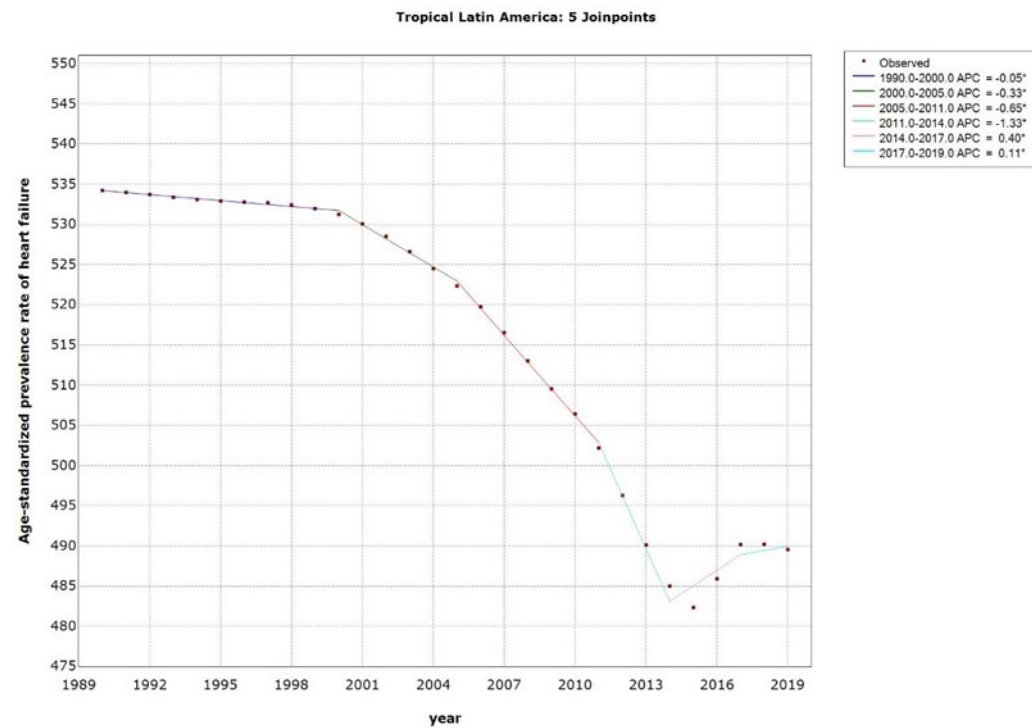

**Figure S33.** The Joinpoint regression analysis showing annual percentage (APC) change for age-standardized prevalence rate of heart failure in Western Europe from 1990 to 2019.

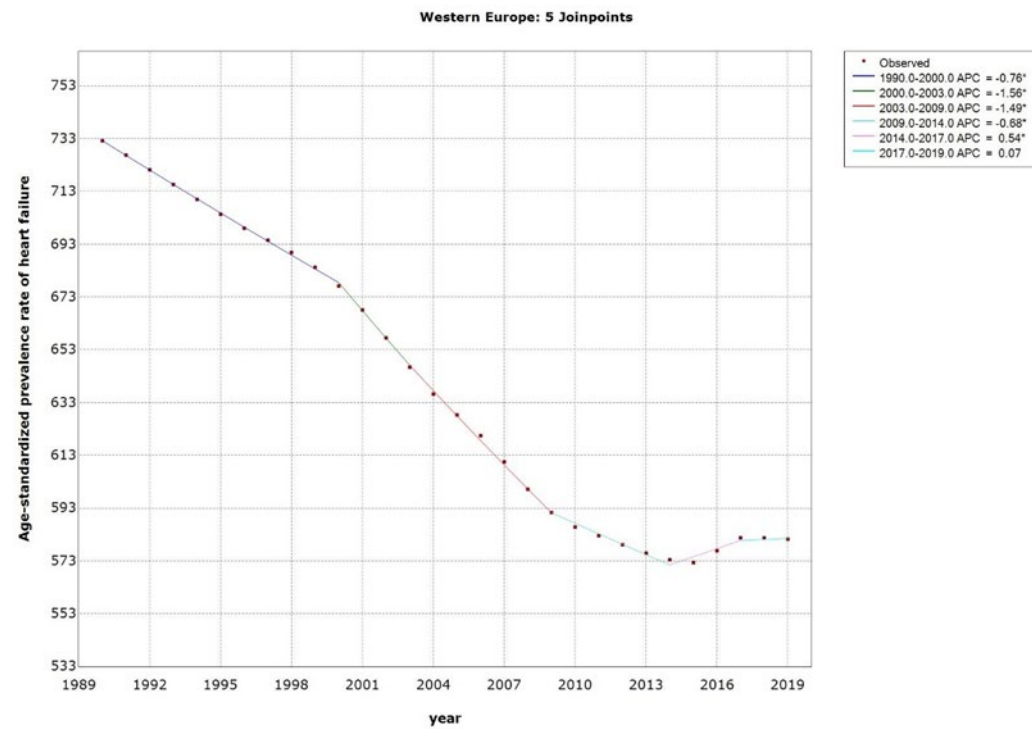

\* Indicates that the Annual Percent Change (APC) is significantly different from zero at the alpha = 0.05 level.  
Final Selected Model: 3 Joinpoints.

**Figure S34.** The Joinpoint regression analysis showing annual percentage (APC) change for age-standardized prevalence rate of heart failure in Western Sub-Saharan Africa from 1990 to 2019.

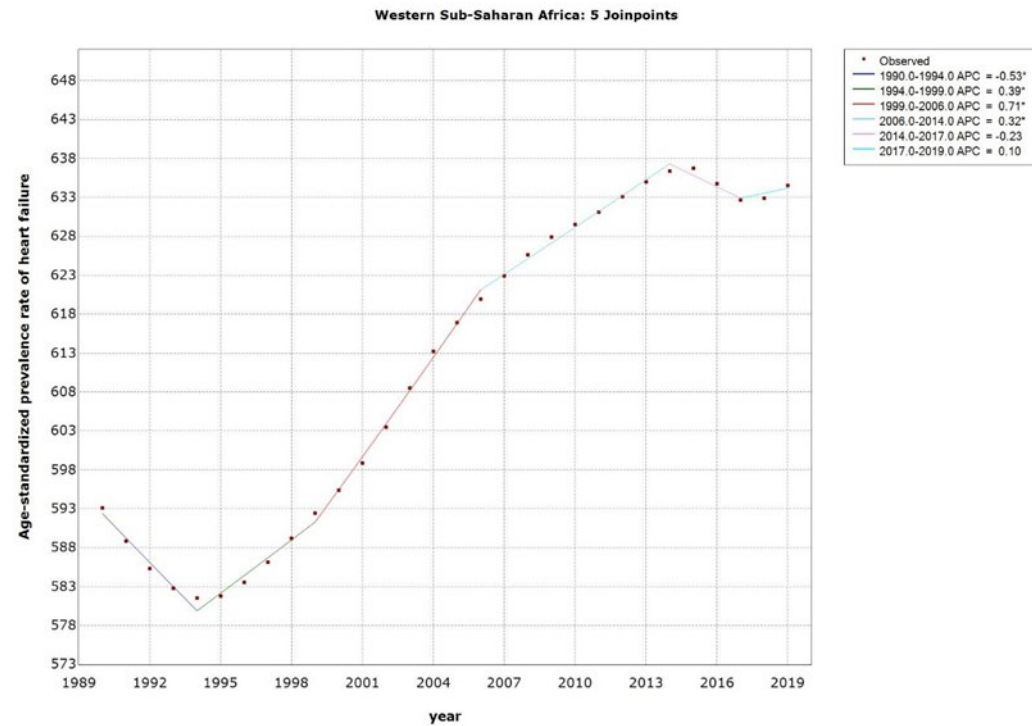

\* Indicates that the Annual Percent Change (APC) is significantly different from zero at the alpha = 0.05 level.  
Final Selected Model: 5 Joinpoints.

**Figure S35.** The top three nations or territories with the most or least age-standardized prevalence rate of heart failure per 100,000 population in 2019. Visualization using the Global Burden of Diseases (GBD) Compare Tool (<https://www.healthdata.org/data-visualization/gbd-compare>).

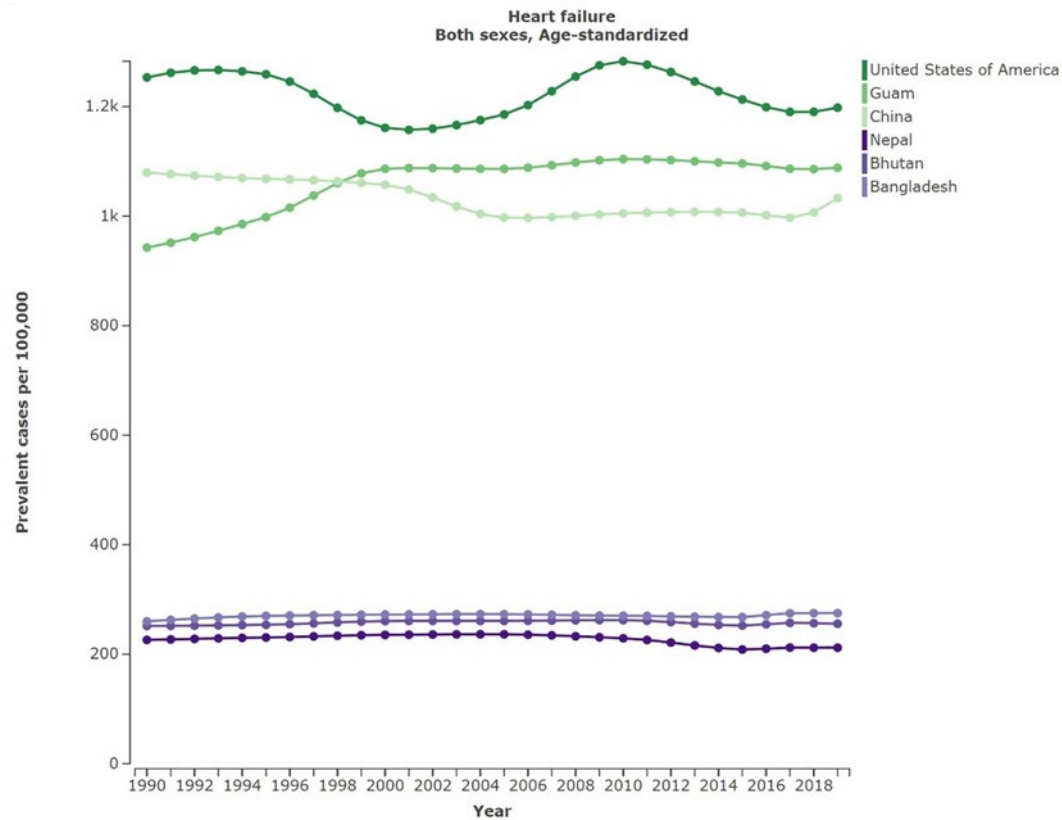

**Figure S36.** The top three nations or territories with increased or decreased trends of age-standardized prevalence rate of heart failure per 100,000 population in 2019. Visualization using the Global Burden of Diseases (GBD) Compare Tool (<https://www.healthdata.org/data-visualization/gbd-compare>).

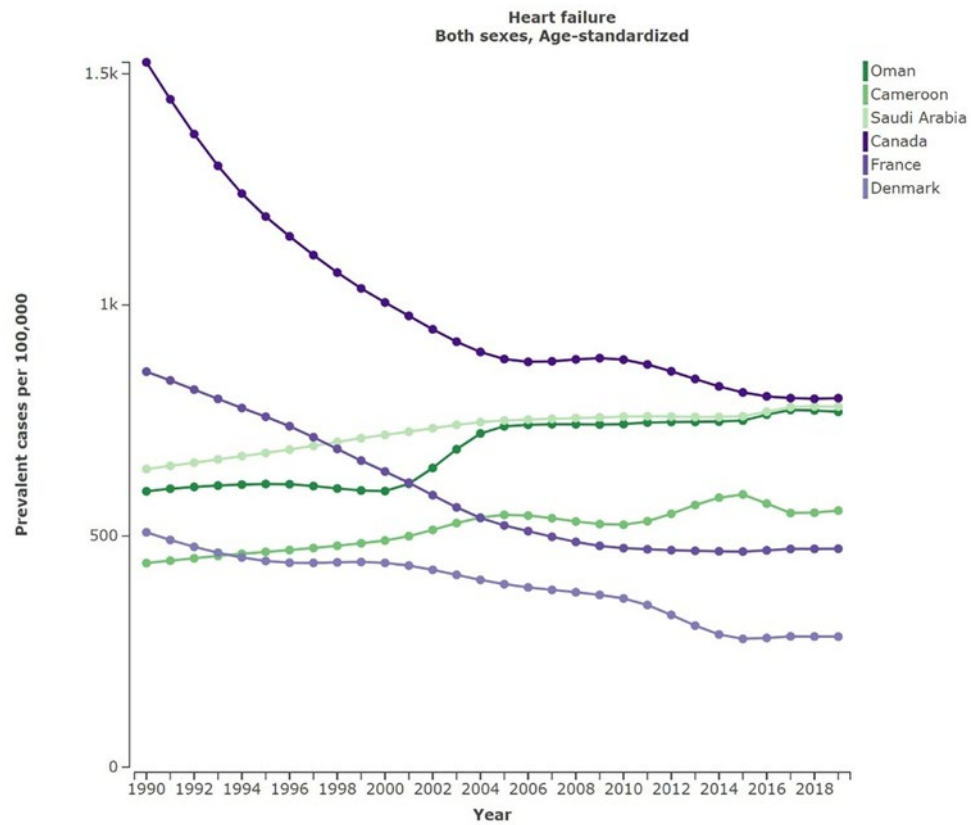



**Figure S37.** The Joinpoint regression analysis showing annual percentage (APC) change for age-standardized prevalence rate of heart failure in Oman from 1990 to 2019.

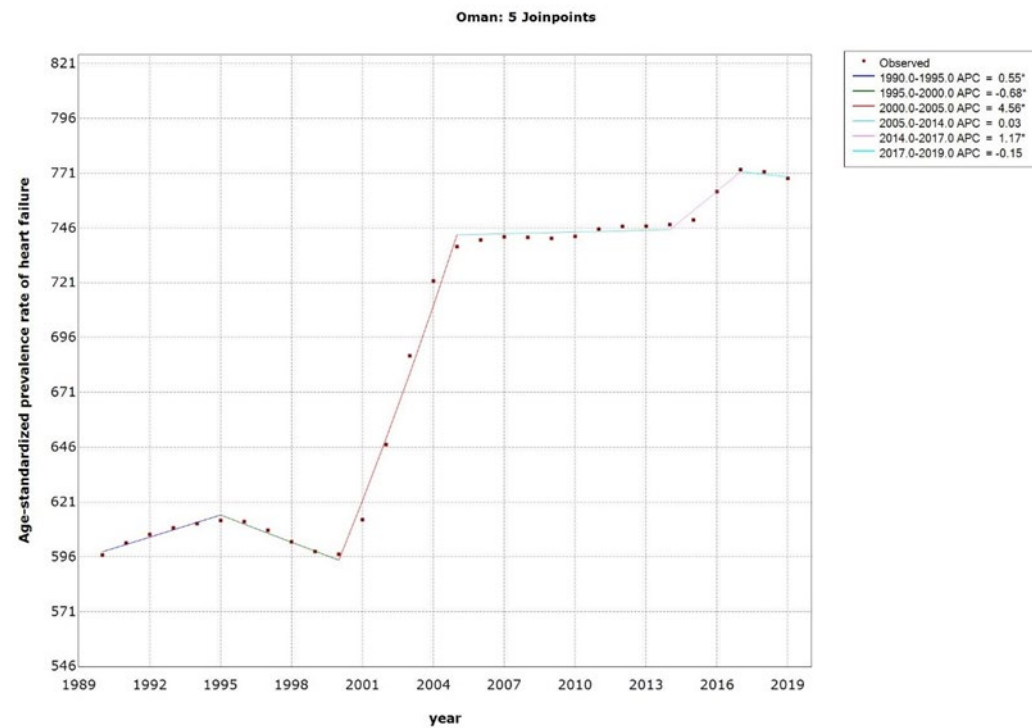

\* Indicates that the Annual Percent Change (APC) is significantly different from zero at the alpha = 0.05 level.  
Final Selected Model: 4 Joinpoints.

**Figure S38.** The Joinpoint regression analysis showing annual percentage (APC) change for age-standardized prevalence rate of heart failure in Cameroon from 1990 to 2019.

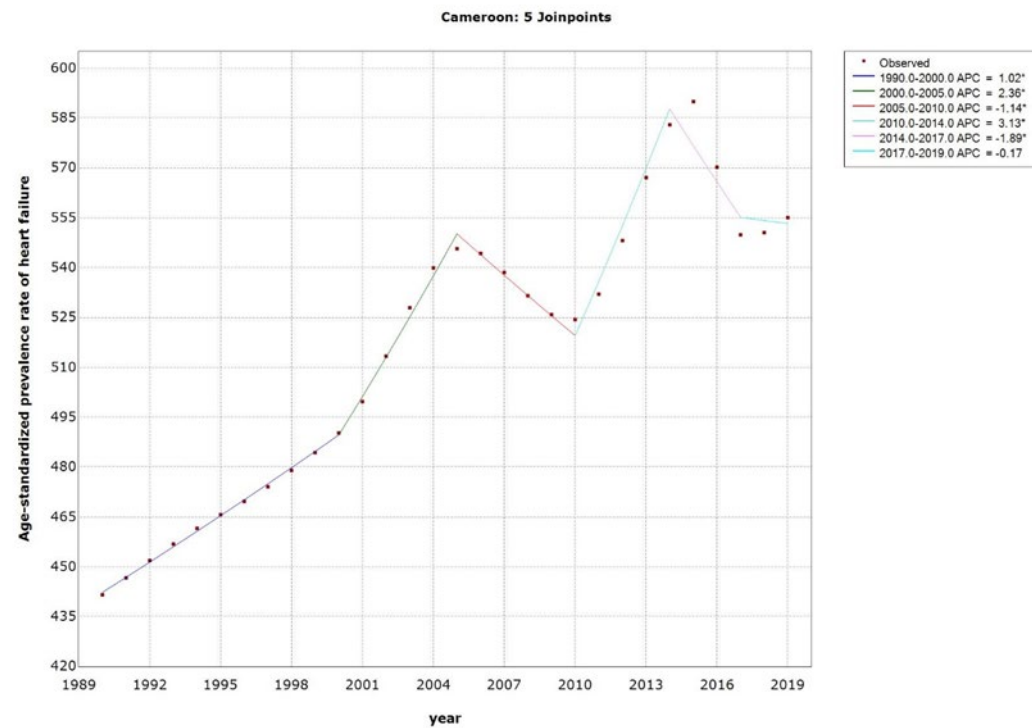

\* Indicates that the Annual Percent Change (APC) is significantly different from zero at the alpha = 0.05 level.  
Final Selected Model: 4 Joinpoints.

**Figure S39.** The Joinpoint regression analysis showing annual percentage (APC) change for age-standardized prevalence rate of heart failure in Saudi Arabia from 1990 to 2019.

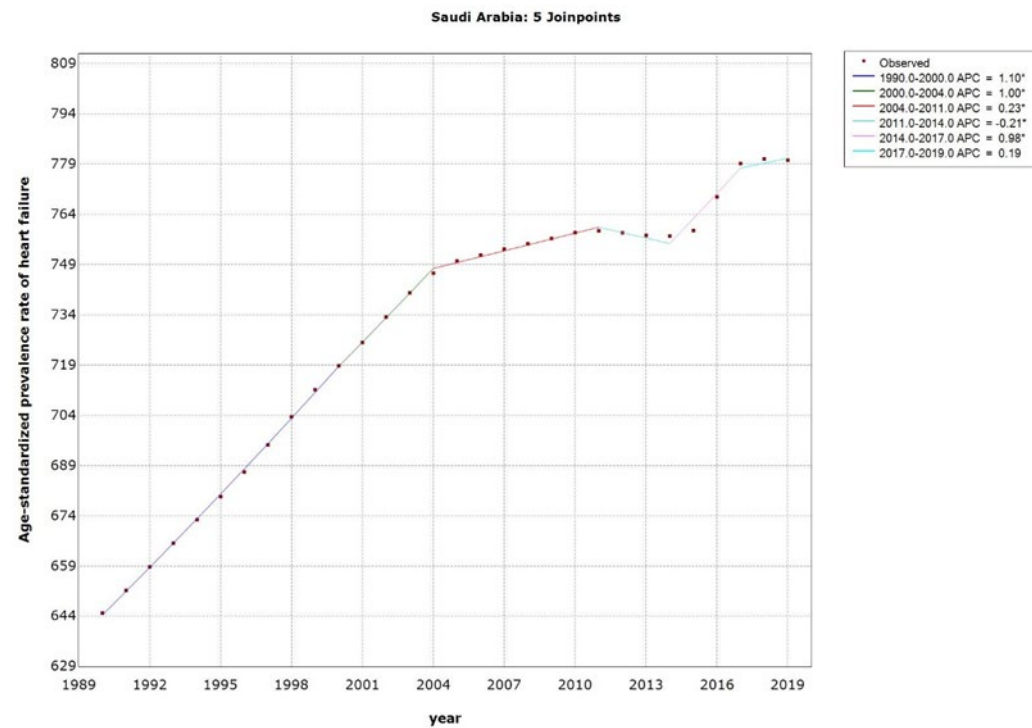

\* Indicates that the Annual Percent Change (APC) is significantly different from zero at the alpha = 0.05 level.  
Final Selected Model: 4 Joinpoints.

**Figure S40.** The Joinpoint regression analysis showing annual percentage (APC) change for age-standardized prevalence rate of heart failure in Canada from 1990 to 2019.

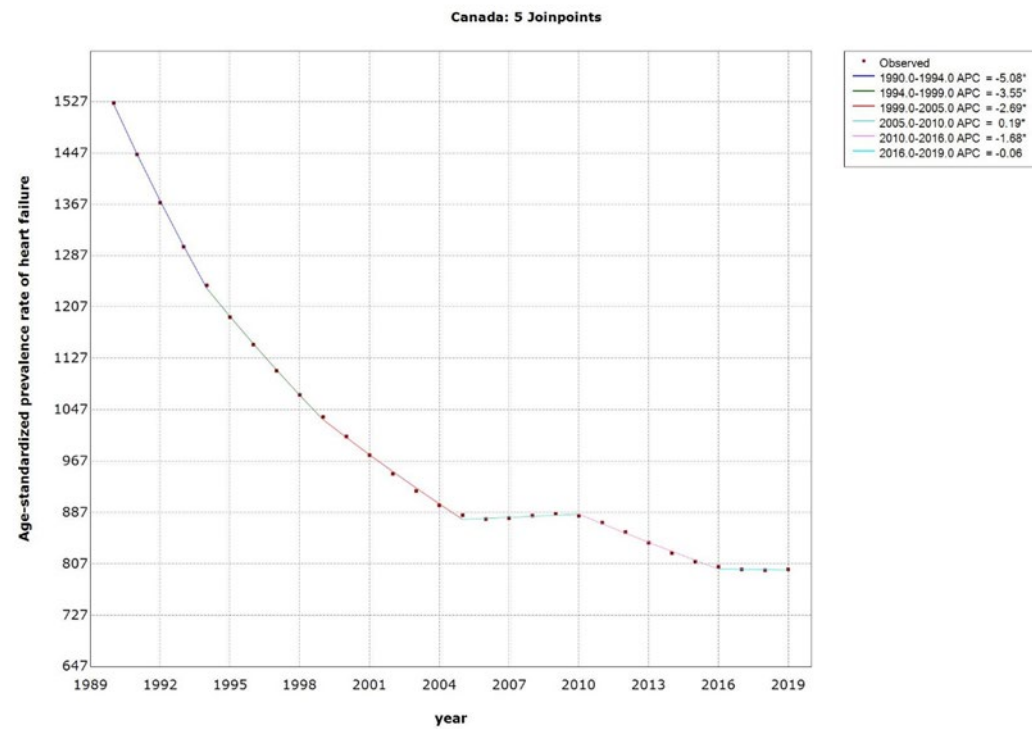

\* Indicates that the Annual Percent Change (APC) is significantly different from zero at the alpha = 0.05 level.  
Final Selected Model: 5 Joinpoints.

**Figure S41.** The Joinpoint regression analysis showing annual percentage (APC) change for age-standardized prevalence rate of heart failure in France from 1990 to 2019.

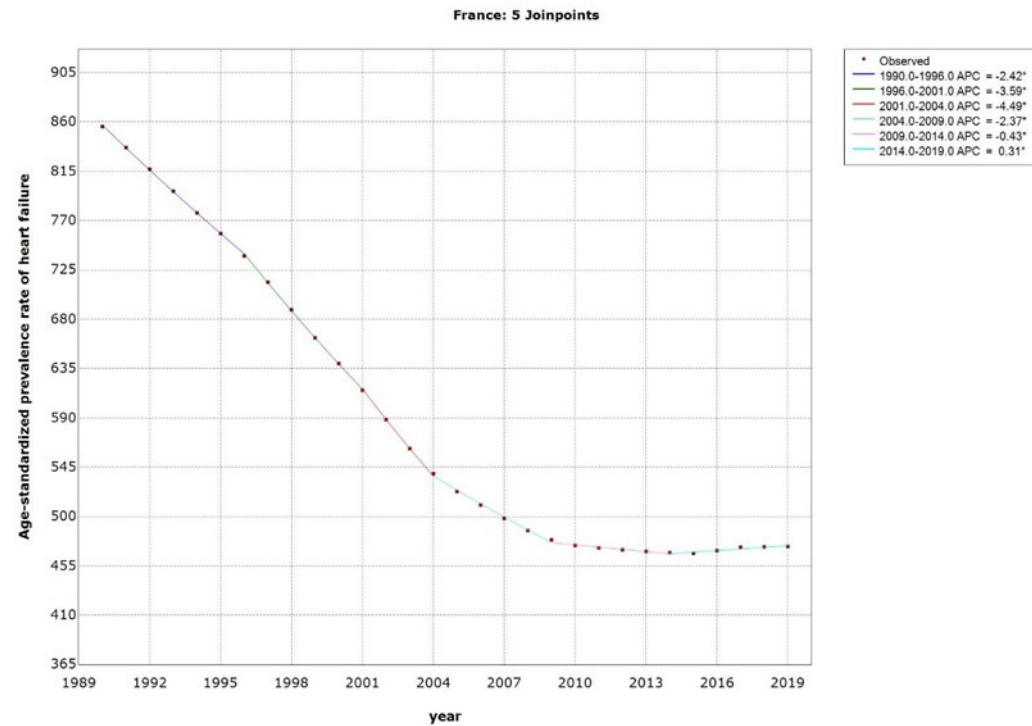

\* Indicates that the Annual Percent Change (APC) is significantly different from zero at the alpha = 0.05 level.  
Final Selected Model: 5 Joinpoints.

**Figure S42.** The Joinpoint regression analysis showing annual percentage (APC) change for age-standardized prevalence rate of heart failure in Denmark from 1990 to 2019.

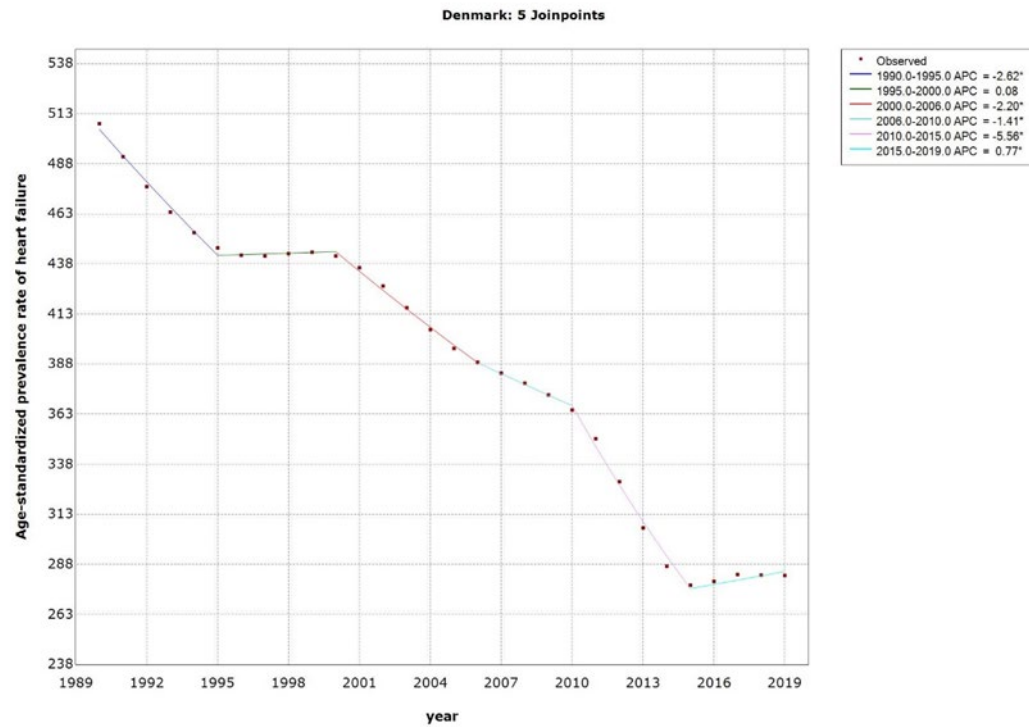

\* Indicates that the Annual Percent Change (APC) is significantly different from zero at the alpha = 0.05 level.  
Final Selected Model: 4 Joinpoints.

**Figure S43.** Global age-standardized point prevalence rate of heart failure per 100,000 population in 2019 by different age groups. Visualization using the Global Burden of Diseases (GBD) Compare Tool (<https://www.healthdata.org/data-visualization/gbd-compare>).

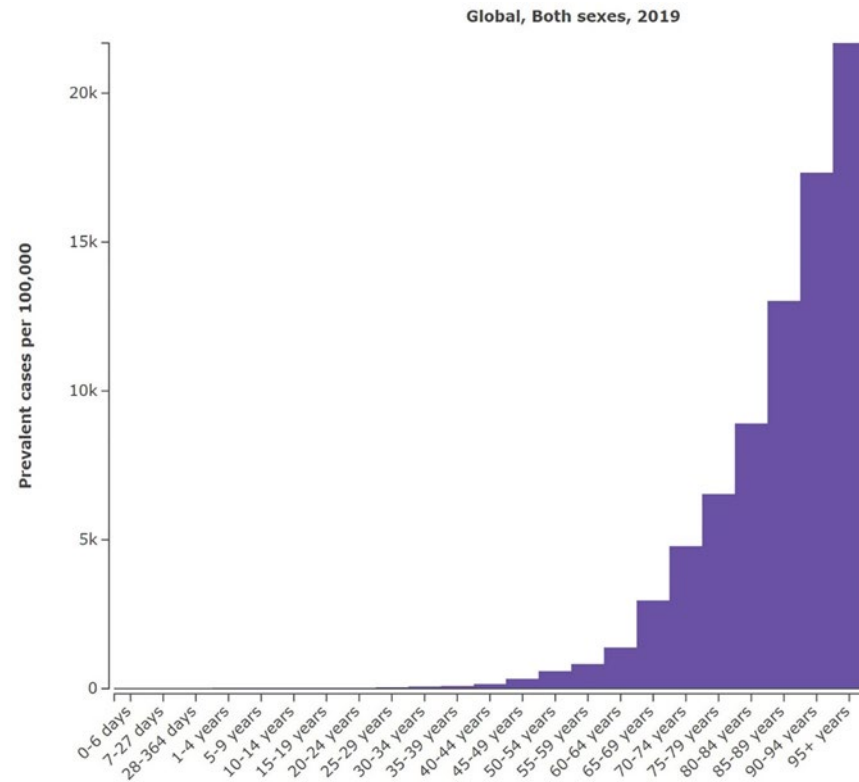

Supplement: JAH3-12-e027852-s001.pdf [file JAH3-12-e027852-s001.pdf]
